# Supplementary material for: Targeting SOX13 inhibits assembly of respiratory chain supercomplexes to overcome ferroptosis resistance in gastric cancer
Source: PubMed Central journal article supplement (PMC11106335; doi:10.1038/s41467-024-48307-z), 2024-05-20
Supplement: 41467_2024_48307_MOESM1_ESM.pdf [file 41467_2024_48307_MOESM1_ESM.pdf]

## Supplementary Information

**Supplemental Table S1.** Clinicopathological characteristics of 109 GC patients

| Characteristics                 | Number of patients (%) |
|---------------------------------|------------------------|
| Patients                        | 109                    |
| Gender                          |                        |
| Male                            | 68 (62.39%)            |
| Female                          | 41 (37.61%)            |
| Age (years)                     | 26 to 84, mean 54.78   |
| Tumor size (cm)                 | 3.2 to 12.5, mean 6.36 |
| Lymph node metastasis (N stage) |                        |
| N0                              | 1 (0.92%)              |
| N1                              | 29 (26.61%)            |
| N2                              | 37 (33.94%)            |
| N3                              | 42 (38.53%)            |
| Depth of invasion (T stage)     |                        |
| T1                              | 0 (0.00%)              |
| T2                              | 3 (2.75%)              |
| T3                              | 18 (16.51%)            |
| T4a                             | 84 (77.06%)            |
| T4b                             | 4 (3.67%)              |
| Histology                       |                        |
| well and moderately             | 54 (49.54%)            |
| Poorly and others               | 55 (50.46%)            |
| Perineural Invasion             |                        |
| Negative                        | 70 (64.22%)            |
| Positive                        | 39 (35.78%)            |
| Lymphovascular invasion         |                        |
| Negative                        | 66 (60.55%)            |
| Positive                        | 43 (39.45%)            |

**Supplementary Table S2.** Clinicopathological characteristics of 52 GC patients

| Characteristics         | Number of patients (%) |
|-------------------------|------------------------|
| Patients                | 52                     |
| Gender                  |                        |
| Male                    | 33 (63.46%)            |
| Female                  | 19 (36.53%)            |
| Age (years)             | 27 to 73, mean 52.32   |
| Tumor size (cm)         | 5.6 to 13.8, mean 8.36 |
| Tumor (pre-NAC,CT)      |                        |
| T4A                     | 38 (73.07%)            |
| T4B                     | 14 (26.92%)            |
| Lymph node (pre-NAC CT) |                        |
| N0                      | 1 (1.92%)              |
| N1                      | 4 (7.69%)              |
| N2                      | 41 (78.85%)            |
| N3                      | 6 (11.54%)             |
| TNM stage (pre-NAC CT)  |                        |
| III                     | 48 (92.31%)            |
| IVA                     | 4 (7.69%)              |

### Supplementary Table S3. Primer sequence used in this study.

| PCR Primers                                           |                                                        | Enzyme   |
|-------------------------------------------------------|--------------------------------------------------------|----------|
| Gene                                                  | sequence                                               |          |
| β-Actin-F                                             | 5'-GGGAAATCGTGCGTGACATTAAG-3'                          |          |
| β-Actin -R                                            | 5'-TGTGTTGGCGTACAGGTCTTTG-3'                           |          |
| SOX13-F                                               | 5'- CTATGTCCCTCGTAGCCT-3'                              |          |
| SOX13-R                                               | 5'- AGCACCACCAACTCCC -3'                               |          |
| SCAF1-F                                               | 5'- CACCAACTAAACTGACCTCCG-3'                           |          |
| SCAF1-R                                               | 5'- GGGCACACCATCAGCTTCT-3'                             |          |
| Cox7a2-F                                              | 5'-CTCGGAGGTAGTTCCGGTTC-3'                             |          |
| Cox7a2-R                                              | 5'-TCTGCCAATCTGACGAAGAG-3'                             |          |
| NADK-F                                                | 5'-CACAATGGGCTGGGTGAGAA-3'                             |          |
| NADK-R                                                | 5'-TGGACAGGTAGGAGGAGGG-3'                              |          |
| NADK2-F                                               | 5'-GCTCTACAGTCCGGAAGAACC -3'                           |          |
| NADK2-R                                               | 5'-GCATCCCAACAACGAGAACG -3'                            |          |
| SCAF1-F (mice)                                        | 5'- GTTAGCAGTTTCACGCAGAAG-3'                           |          |
| SCAF1-R (mice)                                        | 5'-GGCAAATATGATAGGTGGTGCT-3'                           |          |
| Primers for SCAF1 promoter construct:                 |                                                        |          |
| (-1443/+60) SCAF1 sense:                              | 5'-TATAG <u>ATTC</u> GTAACGGGGCAGGGAG-3'               | KpnI     |
| (-926/+60) SCAF1:                                     | 5'-TATAG <u>ATTC</u> GCTATGGGGTCGGGCTTCTA -3'          | KpnI     |
| (-323/+60) SCAF1                                      | 5'-TATAG <u>ATTC</u> CCTCCTGTTCCGCCACCC-3'             | KpnI     |
| (-103/+60) SCAF1:                                     | 5'- TATAG <u>ATTC</u> ACGTCGCCGTGCTCGGTACT -3'         | KpnI     |
| Antisense:                                            | 5'- ATATAGAT <u>CT</u> GACTCATCTTCTCTCCAT -3'          | Hind III |
| Primers for SCAF1 promoter site-directed mutagenesis: |                                                        |          |
| binding site 3 mutation sense:                        | 5'-GGGTCCTTAGGAGAAAA <u>Tactc</u> CTGGAGATGTGGACTCC-3' |          |
| binding site 3 mutation antisense:                    | 5'-GGAGTCCACATCTCCAG <u>Gagta</u> TTTTCTCCTAAGGACCC-3' |          |
| binding site 2 mutation sense:                        | 5'-CTGGAGTGCAATGG <u>ga</u> CGATCTTGGCCAC -3'          |          |
| binding site 2 mutation antisense:                    | 5'-GTGGCCAAGATCGT <u>cc</u> CATTGCACTCCAG -3'          |          |
| binding site 1 mutation sense:                        | 5'-CCCATGTGTCCATT <u>ac</u> CTTCTGGGAAACCG -3'         |          |
| binding site 1 mutation antisense:                    | 5'-CGGTTTCCCAGAAG <u>Gta</u> ATGGGACACATGGG -3'        |          |
| Primers used for ChIP in the SCAF1 promoter:          |                                                        |          |
| binding site 3 sense (-1287~-1277):                   | 5'-GGGTCCTTAGGAGAAAA-3'                                |          |
| binding site 3 antisense (-1287~-1277):               | 5'-CCGGCTCCCTCCTTA-3'                                  |          |
| binding site 2 sense (-840~-830):                     | 5'-GGAGTTTCCGTCTGTAG-3'                                |          |
| binding site 2 antisense                              | 5'-CGGGAGGCTGAGGTAG-3'                                 |          |

(-840~830):  
binding site 1 sense 5'-GCGACAGAGGCGGTGC-3'  
(-153~143):  
binding site 1 antisense 5'-ACGGCGACGTGAAGGC-3'  
(-153~143):

---

Vector construction

---

|                 |                                                                          |
|-----------------|--------------------------------------------------------------------------|
| shRNA-SOX13-1   | 5'- CCGGCCTGCAAACCAGTGGAGTATC<br>CTCGAGGATACTCCACTGGTTTGCAGGTTTTTTTG -3' |
| shRNA-SOX13-2   | 5'- CCGGACCTCAGCCTTTAGGGCTTATCT<br>CGAGATAAGCCCTAAAGGCTGAGGTTTTTTTG -3'  |
| siRNA-NADK-1    | 5'- UGAAUGAGGUGGUGAUUGA-3'                                               |
| siRNA-NADK-2    | 5'- CGCCAGCGAUGAAAGCUUU-3'                                               |
| siRNA-NADK-3    | 5'- GAAGACGGCGUGCACAAU-3'                                                |
| siRNA-NADK2-1   | 5'- GCAAUUGCUUCGAUGAUGA-3'                                               |
| siRNA-NADK2-2   | 5'- GAGAAUUGGUAGAGAAAGU-3'                                               |
| siRNA-NADK2-3   | 5'- UGUGAAAGCUGGACGGUAU-3'                                               |
| shRNA-NC        | 5'- CAACAAGATGAAGAGCACCAA -3'                                            |
| Lv-SOX13-F      | 5'-TATAAAGCTTCTGAGTAGATGTCCATGAGG-3'                                     |
| Lv-SOX13-R      | 5'-ATATTCTAGAGGATCAGTCTGTGAGCACCA-3'                                     |
| sg-SCAF1(human) | 5'-GGTGTGGCAAATATGATAGG-3'                                               |
| sg-SCAF1(mice)  | 5'-GGTGACGATAGCCCCGCC-3'                                                 |

---



**Supplementary Table S4. Information on antibodies.**

| Antibody       | IHC   | WB     | CHIP | Specificity       | Company (catalog number) |
|----------------|-------|--------|------|-------------------|--------------------------|
| SOX13          | 1:100 | 1:1000 | 1:50 | Rabbit polyclonal | proteintech (18902-1-AP) |
| COX7A2L/SCAF1  | 1:100 | 1:1000 | /    | Rabbit Polyclonal | proteintech (11416-1-AP) |
| NADK           | /     | 1:1000 | /    | Rabbit polyclonal | Abcam (ab233261)         |
| NADK2          | /     | 1:1000 | /    | Rabbit monoclonal | Abcam (ab181028)         |
| ACSL4          | /     | 1:1000 | /    | Rabbit monoclonal | Abcam (ab155282)         |
| SLC7A11        | /     | 1:1000 | /    | Rabbit monoclonal | Abcam (ab175186)         |
| GPX4           | /     | 1:1000 | /    | Rabbit monoclonal | Abcam (ab125066)         |
| E-cadherin     | /     | 1:800  | /    | Mouse monoclonal  | Abcam (ab1416)           |
| Vimentin       | /     | 1:1000 | /    | Rabbit monoclonal | Abcam (ab92547)          |
| SDHA           | /     | 1:1000 | /    | Mouse monoclonal  | Abcam (ab14715)          |
| MTCO1          | /     | 1:1000 | /    | Mouse monoclonal  | Abcam (ab14705)          |
| NDUFS2         | /     | 1:1000 | /    | Mouse monoclonal  | Abcam (ab110249)         |
| UQCRC2         | /     | 1:1000 | /    | Mouse monoclonal  | Abcam (ab14745)          |
| Trim25         | /     | 1:1000 | /    | Rabbit monoclonal | Abcam (ab167154)         |
| FBXO28         | /     | 1:800  |      | Rabbit polyclonal | Abcam (ab154068)         |
| TRAF2          | /     | 1:1000 |      | Rabbit monoclonal | Abcam (ab126758)         |
| $\beta$ -Actin | /     | 1:2000 | /    | Rabbit polyclonal | Abcam (ab8227)           |

**Supplementary Table S5.** Correlation between SOX13/SCAF1 immunohistochemical scores in 109 GC samples or normal tissue samples. Statistical significance is determined by Pearson correlation analysis.

|        |         |         |
|--------|---------|---------|
| Tumor  | r=0.406 | p<0.001 |
| Normal | r=0.162 | p=0.214 |

**Supplementary Table S6.** Correlation between SOX13/SCAF1 coexpression values and Tumor regression Grade. Statistical significance is determined by the nonparametric Mann-Whitney Wilcoxon test.

| SOX13/SCAF1<br>coexpression value | Tumor Regression Grade |          | p     |
|-----------------------------------|------------------------|----------|-------|
|                                   | $\leq 2$               | $\geq 3$ |       |
| Low                               | 22                     | 5        | 0.006 |
| High                              | 11                     | 14       |       |

**Supplementary Table S7.** Correlation between 4-HNE staining and Tumor regression Grade. Statistical significance is determined by the nonparametric Mann-Whitney Wilcoxon test.

| 4-HNE staining | Tumor Regression Grade |          | p     |
|----------------|------------------------|----------|-------|
|                | $\leq 2$               | $\geq 3$ |       |
| Low            | 10                     | 16       | 0.003 |
| High           | 23                     | 3        |       |

**Supplementary Table S8.** Correlation between 4-HNE staining and SOX13/SCAF1 IHC scores. Statistical significance is determined by the nonparametric Mann-Whitney Wilcoxon test.

| 4-HNE staining | SOX13/SCAF1 IHC scores |      | p     |
|----------------|------------------------|------|-------|
|                | Low                    | High |       |
| Low            | 9                      | 17   | 0.025 |
| High           | 18                     | 8    |       |

**Supplementary Table S9.** The 40 compounds with the highest scores.

| <b>Number</b> | <b>Catalog<br/>Number</b> | <b>Docking score</b> | <b>Number</b> | <b>Catalog<br/>Number</b> | <b>Docking score</b> |
|---------------|---------------------------|----------------------|---------------|---------------------------|----------------------|
| 1             | T1085L                    | -13.589              | 21            | T1352                     | -10.461              |
| 2             | T1663                     | -12.578              | 22            | T0278                     | -10.369              |
| 3             | T0278                     | -12.344              | 23            | T4987                     | -10.339              |
| 4             | T5584                     | -12.303              | 24            | T4726                     | -10.334              |
| 5             | T6654                     | -12.100              | 25            | T2720                     | -10.262              |
| 6             | T4897                     | -11.943              | 26            | T3795                     | -10.260              |
| 7             | T4706                     | -11.742              | 27            | T0148L                    | -10.222              |
| 8             | TMA2440                   | -11.595              | 28            | T0853L                    | -10.211              |
| 9             | TMS1830                   | -11.543              | 29            | T2133                     | -10.121              |
| 10            | T4S1578                   | -11.419              | 30            | T1723                     | -10.095              |
| 11            | T2971                     | -11.405              | 31            | T5022                     | -10.049              |
| 12            | T0278                     | -11.388              | 32            | T4718                     | -9.996               |
| 13            | T2812                     | -11.266              | 33            | T0966                     | -9.958               |
| 14            | T2529                     | -11.163              | 34            | T5075                     | -9.942               |
| 15            | T4969                     | -11.006              | 35            | T3910                     | -9.899               |
| 16            | T1192                     | -10.940              | 36            | T2727                     | -9.898               |
| 17            | T5075                     | -10.852              | 37            | T5022                     | -9.866               |
| 18            | T4076                     | -10.699              | 38            | T4901                     | -9.856               |

|    |       |         |    |       |        |
|----|-------|---------|----|-------|--------|
| 19 | T1352 | -10.521 | 39 | T1658 | -9.837 |
| 20 | T2185 | -10.465 | 40 | T2001 | -9.814 |

---

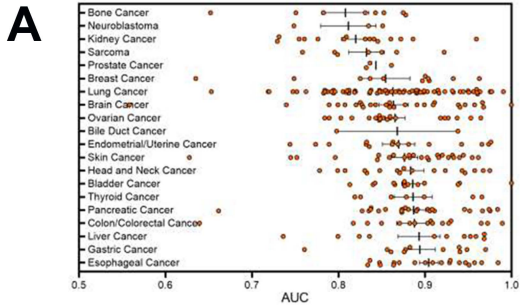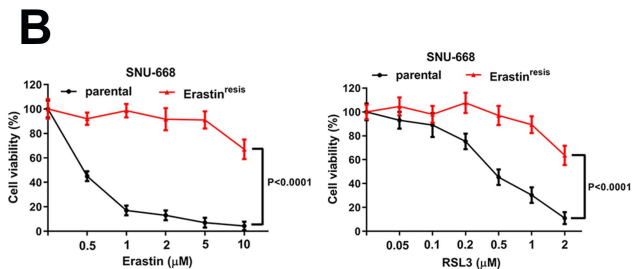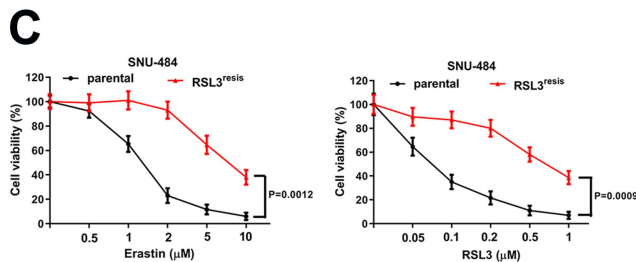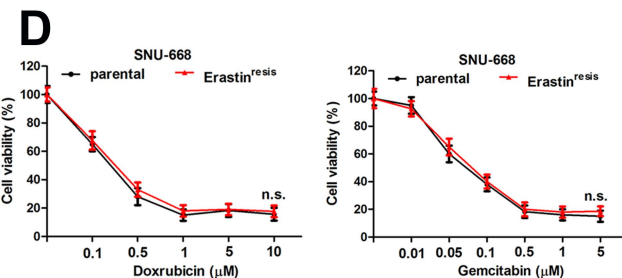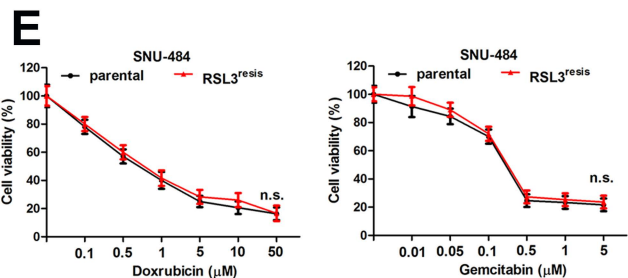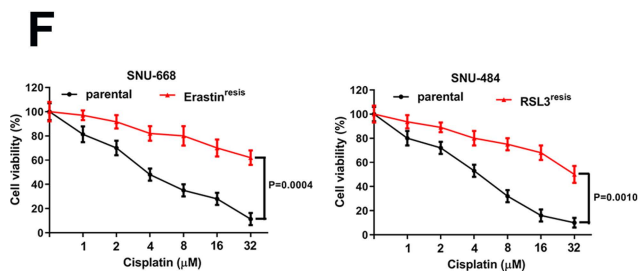

**Supplementary Figure 1.** (A) The sensitivity of 20 tumor types to Erastin was analyzed using the DepMap database. AUC = Area Under Curve. Each dot represents a cell line from indicated cancer type. Cell lines with higher AUC values are more resistant to Erastin. (B,C) Relative viability of parental or Erastin<sup>resis</sup> SNU-668 cells (B) or RSL3<sup>resis</sup> SNU-484 (C) cells treated with different concentrations of the ferroptosis inducers Erastin or RSL3 for 24 h (n=3 independent experiments). Data are presented as mean values  $\pm$  SD. (D,E) Relative viability of parental or Erastin<sup>resis</sup> SNU-668 cells (D) or RSL3<sup>resis</sup> SNU-484 (E) cells treated with different concentrations of the apoptosis inducers doxorubicin and gemcitabine for 24 h (n=3 independent experiments). Data are presented as mean values  $\pm$  SD. (F) Relative viability of parental or Erastin<sup>resis</sup> SNU-668 cells or RSL3<sup>resis</sup> SNU-484 cells treated with different concentrations of cisplatin for 24 h. Cell viability was evaluated with a CellTiter-Glo luminescent cell viability assay (n=3 independent experiments). Data are presented as mean values  $\pm$  SD. Statistical significance in (B-F) is determined by two-tailed unpaired *t*-test. Source data are provided as a Source Data file.

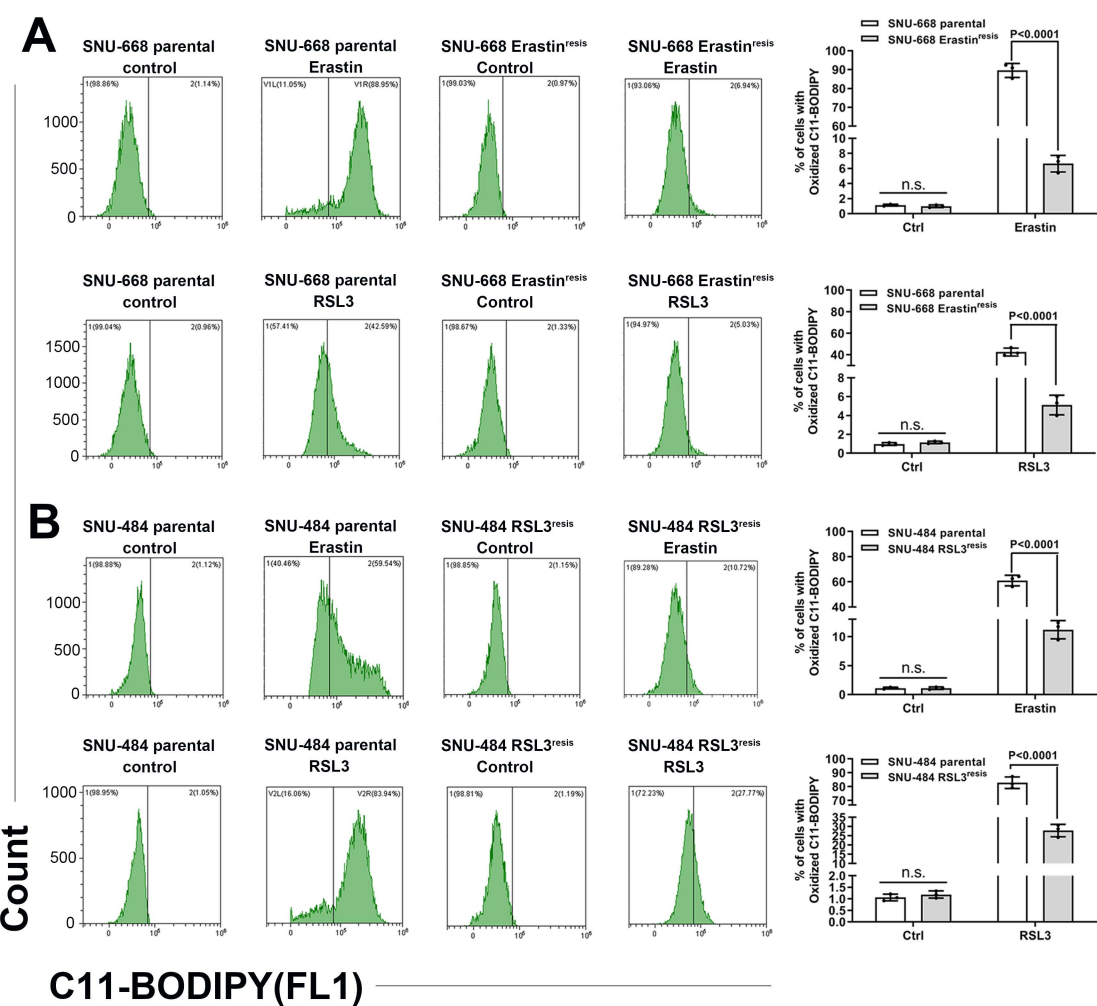

Count

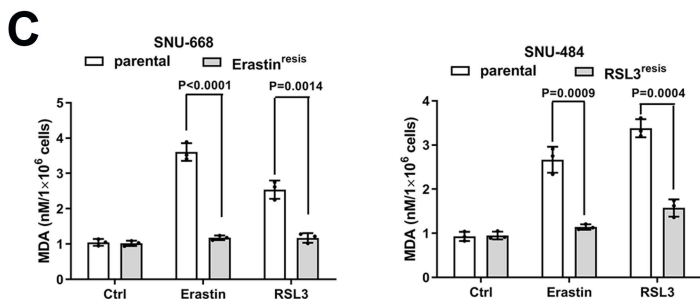

**Supplementary Figure 2.** (A-C) Parental or Erastin<sup>resis</sup> SNU-668 cells or RSL3<sup>resis</sup> SNU-484 cells treated with Erastin (0, 2  $\mu$ M) or RSL3 (0, 0.5  $\mu$ M) for 24 h (n=3 independent experiments). (A,B) Representative histogram plot for fluorescence of oxidized BODIPY-C11. (C) Intracellular MDA were assayed with ELISA. Data are presented as mean values  $\pm$  SD. Statistical significance in (A-C) is determined by two-tailed unpaired *t*-test. Source data are provided as a Source Data file.



SNU-668

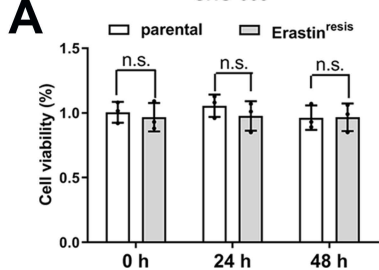

SNU-484

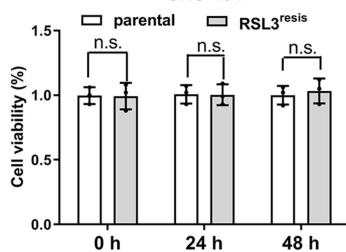

**B** parental SNU-668 Erastin<sup>res</sup> SNU-668

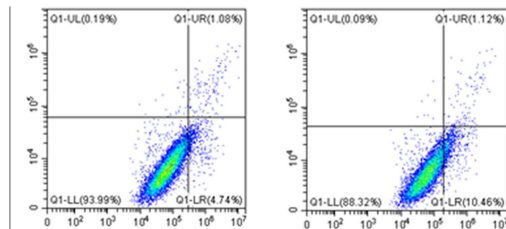

**C** parental SNU-668 Erastin<sup>res</sup> SNU-668

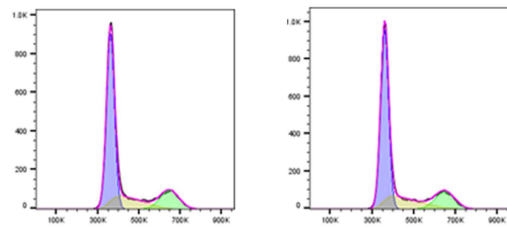

**B** parental SNU-484 RSL3<sup>res</sup> SNU-484

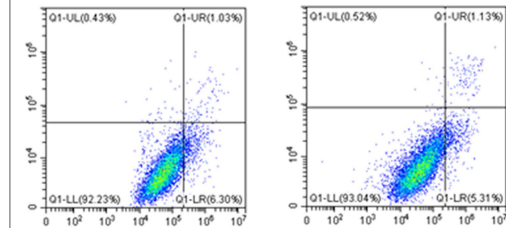

**C** parental SNU-484 RSL3<sup>res</sup> SNU-484

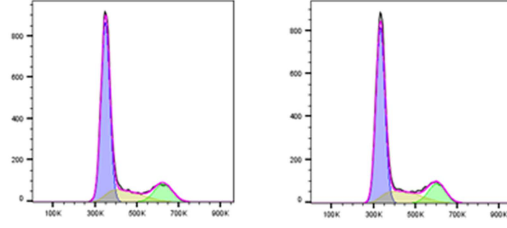

Annexin (FITC)

Apoptosis ratio (%)

parental Resis

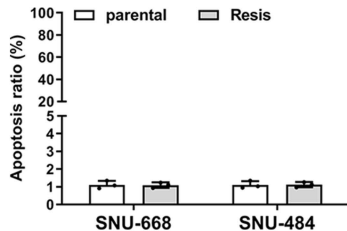

parental SNU-668 Erastin<sup>res</sup> SNU-668  
parental SNU-484 RSL3<sup>res</sup> SNU-484

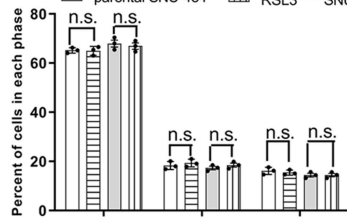

**Supplementary Figure 3.** (A) Relative viability of parental or Erastin<sup>resis</sup> SNU-668 cells or RSL3<sup>resis</sup> SNU-484 cells cultured after 24 h or 48 h (n=3 independent experiments). (B) Annexin V/PI staining and flow cytometry analysis assessing apoptosis in parental or Erastin<sup>resis</sup> SNU-668 cells or RSL3<sup>resis</sup> SNU-484 cells (n=3 independent experiments). (C) Cell cycle analysis in parental or Erastin<sup>resis</sup> SNU-668 cells or RSL3<sup>resis</sup> SNU-484 cells determined the relative cell numbers in each cell-cycle phase with propidium iodide staining (n=3 independent experiments). Statistical significance in (A-C) is determined by two-tailed unpaired *t*-test. Data are presented as mean values  $\pm$  SD. Source data are provided as a Source Data file.

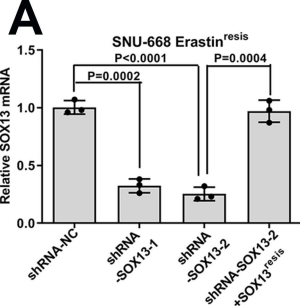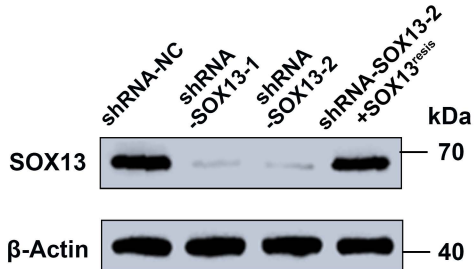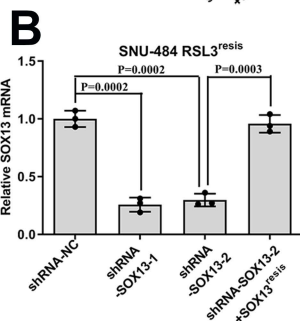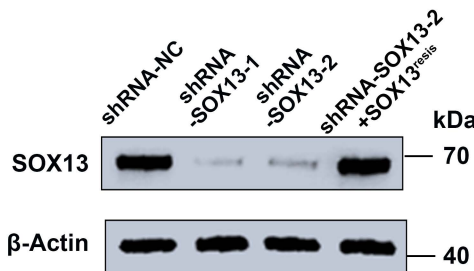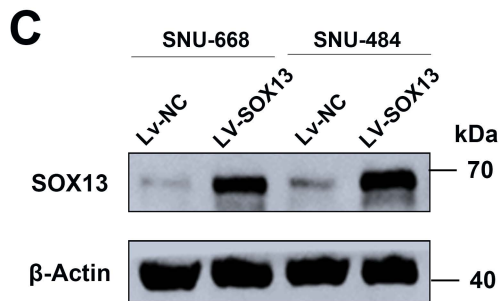

**Supplementary Figure 4.** SOX13 expression was detected in Erastin<sup>resis</sup> SNU-668 cells (A) or RSL3<sup>resis</sup> SNU-484 cells (B) by western blot after transduction of lentiviruses encoding SOX13 shRNA-1 or shRNA-2 or a scrambled shRNA and/or resistant SOX13 cDNA (SOX13<sup>resis</sup>) (n=3 independent experiments). Data are presented as mean values  $\pm$  SD. (C) SOX13 expression was detected in parental SNU-668 and SNU-484 cells by western blot after transfection of lentivirus harboring the human SOX13 sequence or the empty vector (n=3 independent experiments). Statistical significance in (A,B) is determined by two-tailed unpaired *t*-test. Source data are provided as a Source Data file.

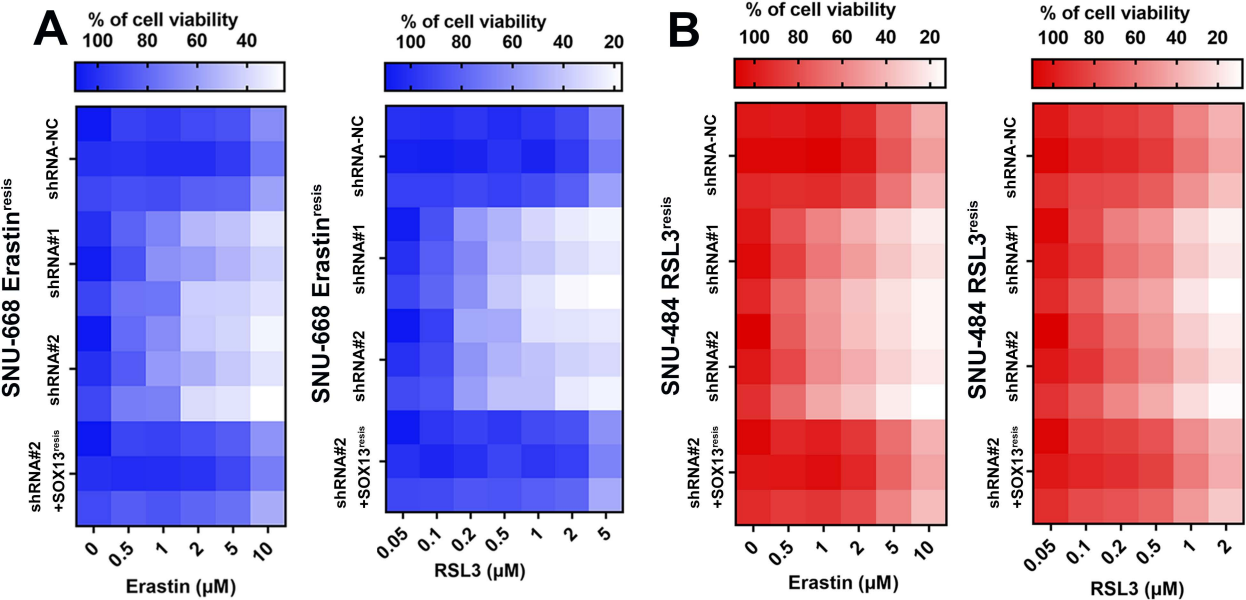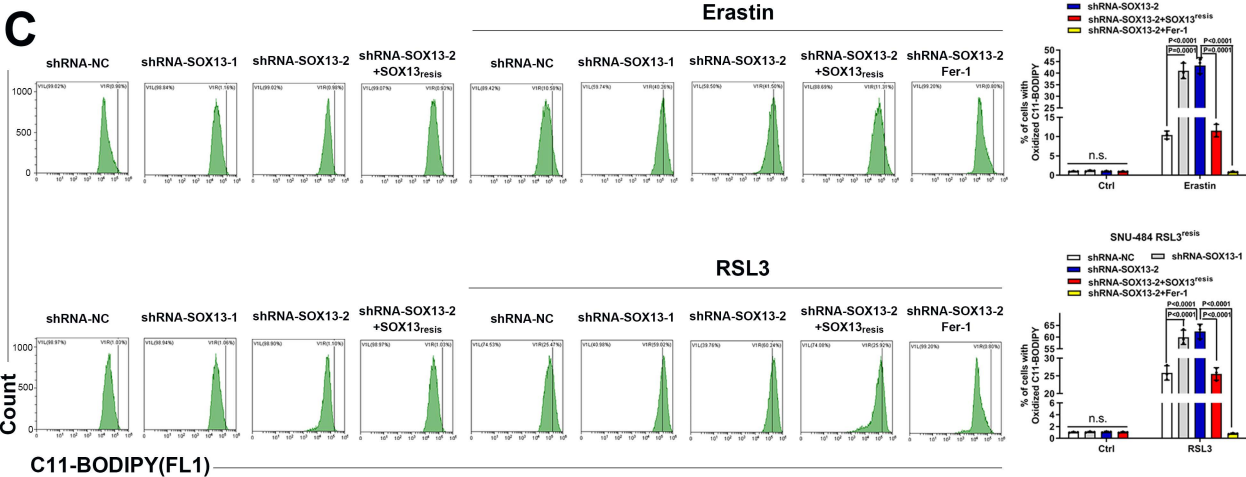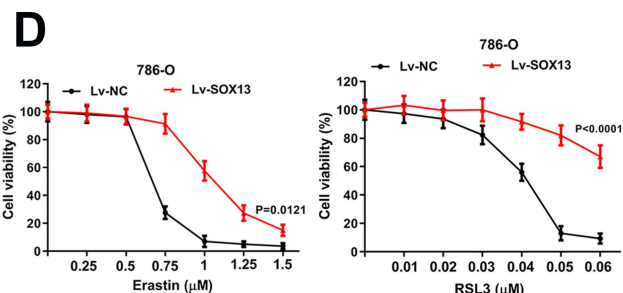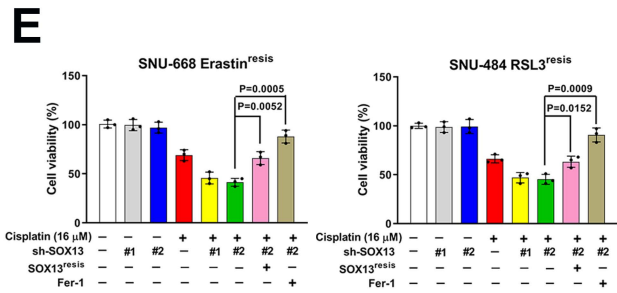

**Supplementary Figure 5.** (A-C) Effect of knockdown of SOX13 and SOX13 re-expression on sensitivity of Erastin<sup>resis</sup> SNU-668 cells (A) or RSL3<sup>resis</sup> SNU-484 cells (B) to the ferroptosis inducers RSL3 or Erastin. The heatmap shows altered cell viability. Cells were treated with lentiviruses encoding SOX13 shRNA-1 or shRNA-2 or a scrambled shRNA alone and/or resistant SOX13 cDNA (SOX13<sup>resis</sup>), or in combination with various concentrations of RSL3 or Erastin for 24 hours. The heatmap shows altered cell viability. (C) SNU-484 RSL3<sup>resis</sup> cells were treated with Erastin (2  $\mu$ M) or RSL3 (0.5  $\mu$ M) for 24 hours. Lipid peroxidation was determined with a lipid peroxidation C11-BODIPY assay in SNU-484 RSL3<sup>resis</sup> cells (n=3 independent experiments), and a representative flow cytometry histogram plot is presented. Data are presented as mean values  $\pm$  SD. (D) 786-O cells were treated with lentivirus harboring the human SOX13 sequence or the empty vector. Cells were treated with different concentrations of the ferroptosis inducers Erastin or RSL3 for 24 h (n=3 independent experiments). Data are presented as mean values  $\pm$  SD. (E) Effect of SOX13 downregulation on cisplatin sensitivity in the absence or presence of Fer-1 (1  $\mu$ M) in Erastin<sup>resis</sup> SNU-668 cells or RSL3<sup>resis</sup> SNU-484 cells (n=3 independent experiments). The cells were treated with cisplatin (16  $\mu$ M) for 24 hours. Data are presented as mean values  $\pm$  SD. Statistical significance in (C-E) is determined by two-tailed unpaired *t*-test. Source data are provided as a Source Data file.



**Supplementary Figure 6.** (A) Effect of SOX13 downregulation and SOX13 re-expression on cisplatin (16  $\mu$ M) sensitivity in the absence or presence of Fer-1 (1  $\mu$ M) in SNU-668 Erastin<sup>resis</sup> and SNU-484 RSL3<sup>resis</sup> cells. Cells were treated with cisplatin (16  $\mu$ M) for 24 hours. Lipid peroxidation was determined with a lipid peroxidation C11-BODIPY assay (n=3 independent experiments) and a representative flow cytometry histogram plot is presented. Data are presented as mean values  $\pm$  SD. (B) Relative viability of parental or DDP<sup>resis</sup> SNU-668 cells treated with different concentrations of cisplatin for 24 h (n=3 independent experiments). Data are presented as mean values  $\pm$  SD. (C) SOX13 and SCAF1 were determined by immunoblotting assay and normalized to  $\beta$ -actin (n=3 independent experiments). (D) Relative viability of parental or DDP<sup>resis</sup> SNU-668 cells treated with different concentrations of Erastin or RSL3 for 24 h (n=3 independent experiments). Data are presented as mean values  $\pm$  SD. (E) Effect of SOX13 downregulation on Erastin (2  $\mu$ M), RSL3 (0.5  $\mu$ M) or Cisplatin (16  $\mu$ M) sensitivity in the absence or presence of Fer-1 (1  $\mu$ M) in DDP<sup>resis</sup> SNU-668 cells (n=3 independent experiments). The cells were treated with FINs or cisplatin for 24 hours. Data are presented as mean values  $\pm$  SD. (F) SNU-668 cells were treated with lentivirus harboring the human SOX13 sequence or the empty vector. Cells were treated with different concentrations of 5-Fu or oxaliplatin for 24 h. Cell viability was evaluated with a CellTiter-Glo luminescent cell viability assay (n=3 independent experiments). Data are presented as mean values  $\pm$  SD. Statistical significance in (A,B,D-F) is determined by two-tailed unpaired *t*-test. Source data are provided as a Source Data file.



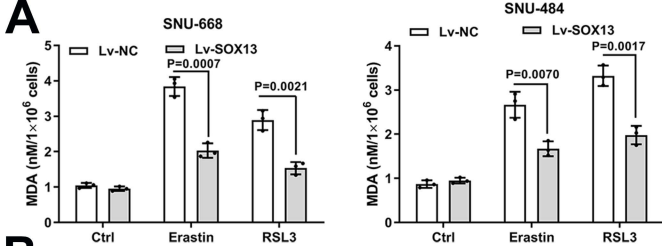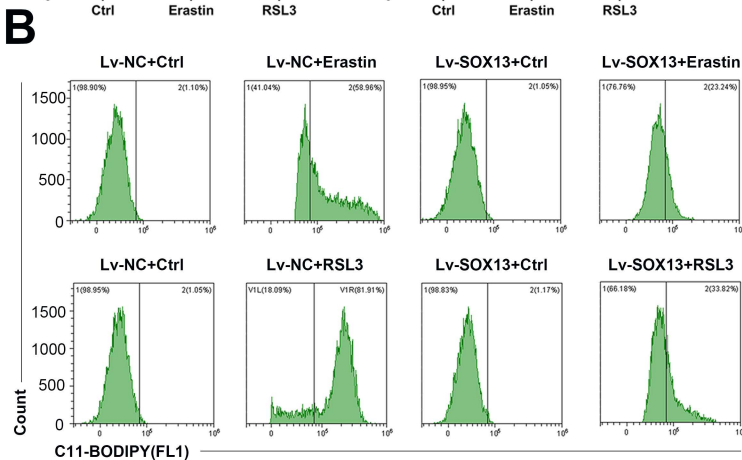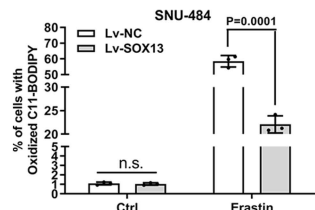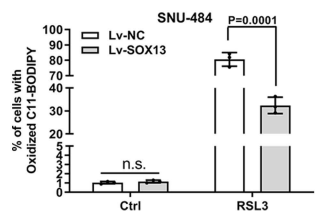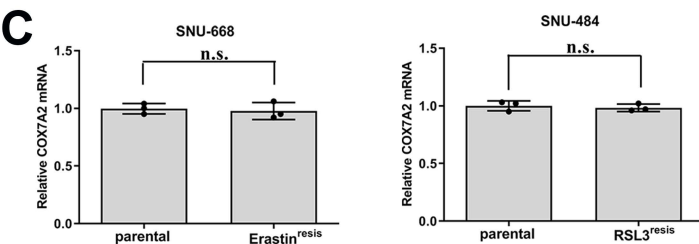

**Supplementary Figure 7.** (A,B) SNU-668/SNU-484 Cells were treated with lentivirus harboring the human SOX13 sequence or the empty vector, or in combination with Erastin (2  $\mu$ M) or RSL3 (0.5  $\mu$ M) for 24 hours. (A) ELISA was utilized to assess the intracellular MDA level (n=3 independent experiments). Data are presented as mean values  $\pm$  SD. (B) Lipid peroxidation was determined with a lipid peroxidation C11-BODIPY assay (n=3 independent experiments), and a representative flow cytometry histogram plot is presented. Data are presented as mean values  $\pm$  SD. (C) COX7A2 mRNA abundance in resistant versus parental cell lines of SNU-668 and SNU-484 (n=3 independent experiments). Data are presented as mean values  $\pm$  SD. Statistical significance in (A-C) is determined by two-tailed unpaired *t*-test. Source data are provided as a Source Data file.

**A**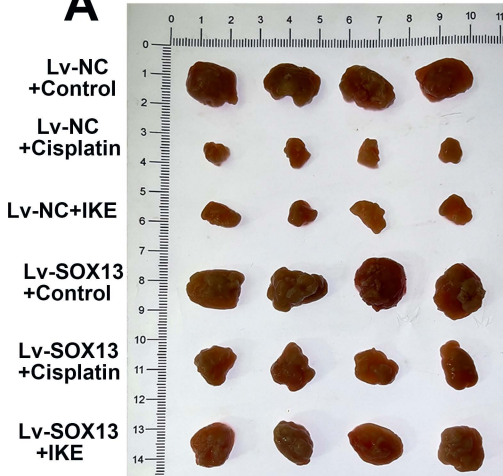**B**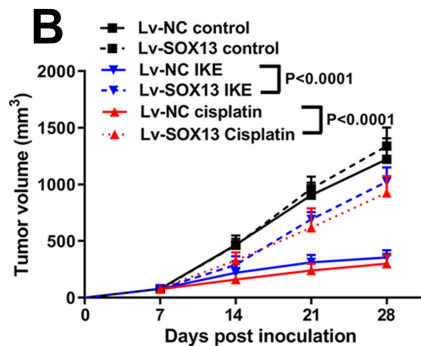**C**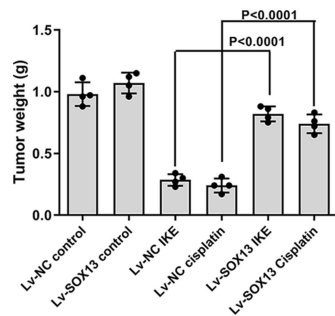**D**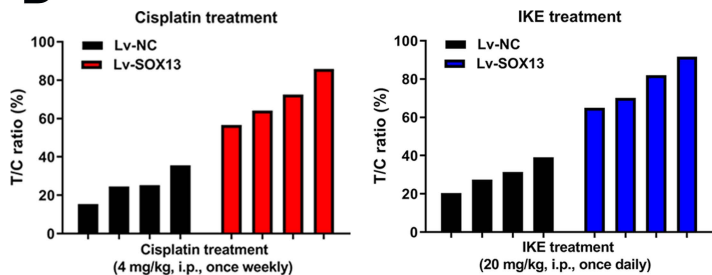**E**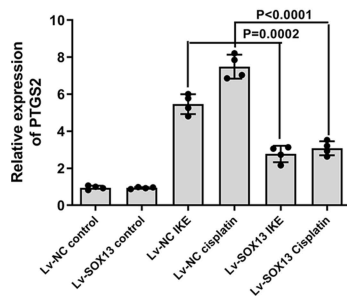

**Supplementary Figure 8.** SNU-484-SOX13-CDX tumors and SNU-484-NC-CDX tumors were treated with cisplatin and IKE. Representative images of tumors formed (A), tumor growth curves (B), tumor weights (C), T/C ratio (D) and PTGS2 (E) expression analysis are shown. Treatment with IKE (20 mg/kg, i.p., once daily), cisplatin (4 mg/kg, i.p., once weekly) or PBS (100  $\mu$ l, i.p., once daily) started on Day 7 and lasted for 3 consecutive weeks (n=4 mice per group).  $T/C\% = T_{RTV}/C_{RTV} \times 100\%$ ;  $T_{RTV}$ , relative tumor volume after treatment;  $C_{RTV}$ , relative tumor volume of control group. Data are presented as mean values  $\pm$  SD. Statistical significance in (B,C,E) is determined by two-tailed unpaired *t*-test. Source data are provided as a Source Data file.

**SNU-668 Erastin<sup>resis</sup>****SNU-484 RSL3<sup>resis</sup>***shRNA-NC**shRNA-SOX13-1**shRNA-SOX13-2**shRNA-NC**shRNA-SOX13-1**shRNA-SOX13-2***SOX13**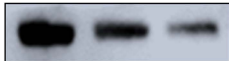**kDa**  
70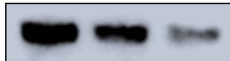**kDa**  
70**E-cadherin**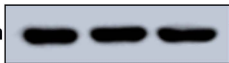**kDa**  
100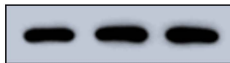**kDa**  
100**Vimentin**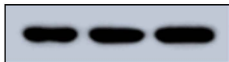**kDa**  
55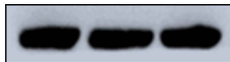**kDa**  
55**β-Actin**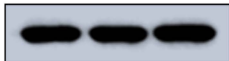**kDa**  
40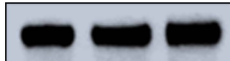**kDa**  
40

**Supplementary Figure 9.** Effect of SOX13 knockdown on E-cadherin and Vimentin protein abundance in FINs resistant cells (n=3 independent experiments).

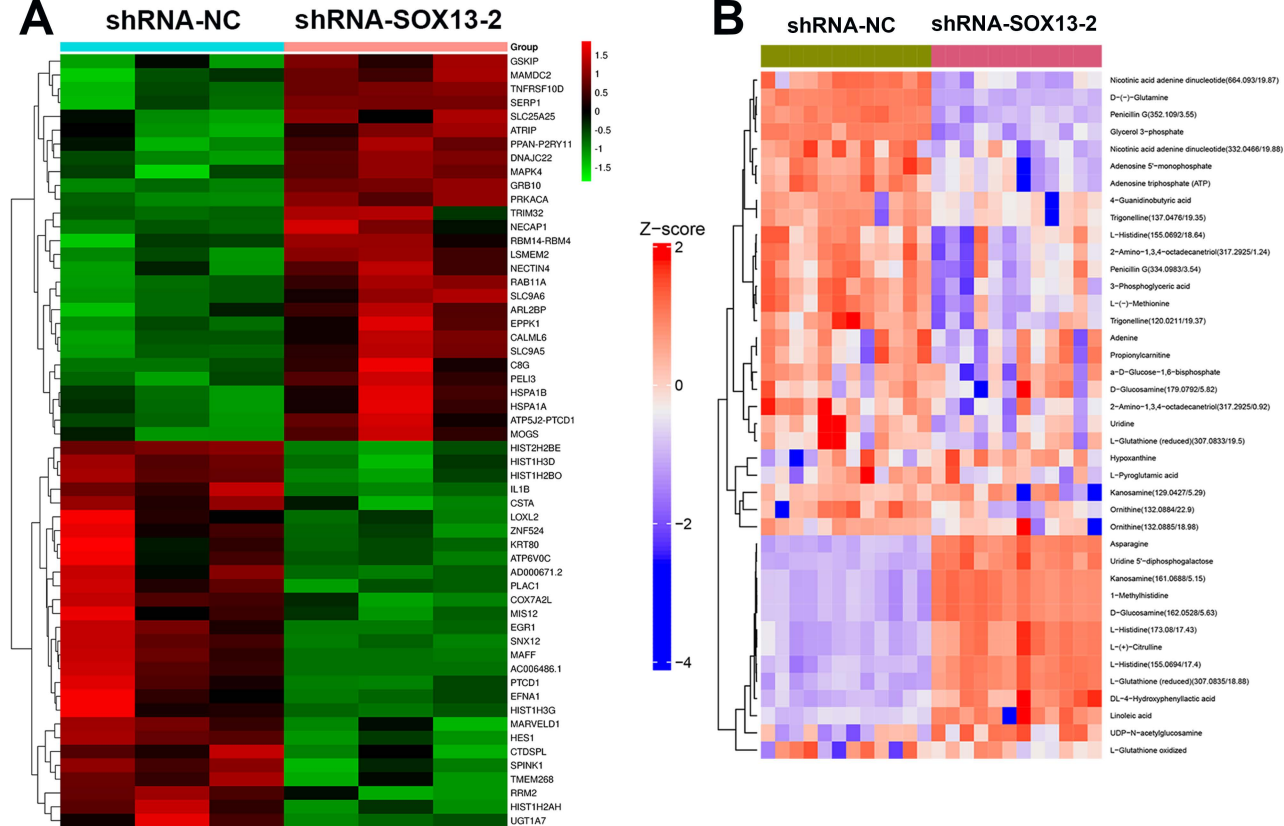

**C**

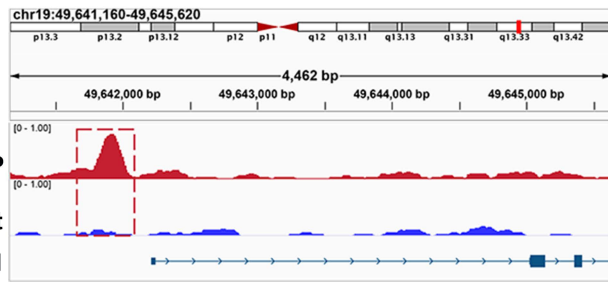

**Supplementary Figure 10.** (A) Heatmap of the top 56 dysregulated genes (>3-fold;  $p < 0.05$ ) in response to SOX13 knockdown (n=3 independent experiments). (B) Metabolic profile changes from control to SOX13-downregulated Erastin<sup>resis</sup> SNU-668 cells (n= 12 independent experiments). (C) Binding profiles and peak calling records of SOX13 in the SCAF1 promoter. Significant peak ( $P < 1 \times 10^{-11}$ ) is highlighted by a red box with dotted line.



**BLCA**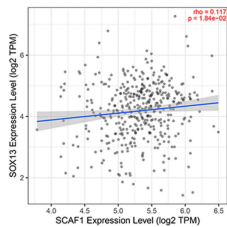**BRCA**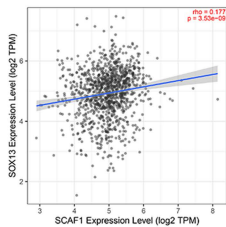**BRCA-LumA**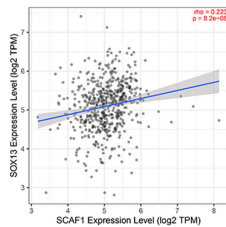**CESC**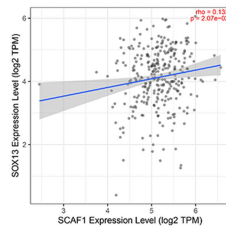**DLBC**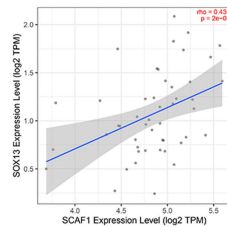**ESCA**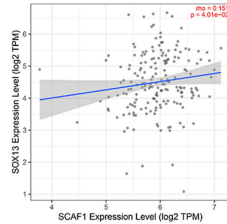**GBM**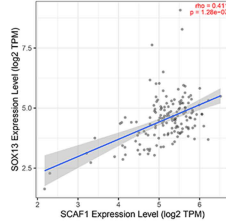**HNSC**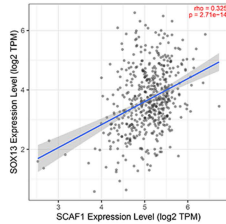**HNSC-HPV-**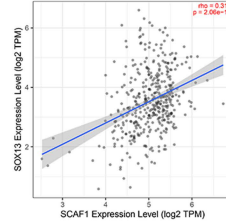**HNSC-HPV+**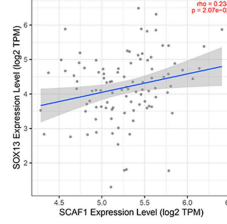**KIRC**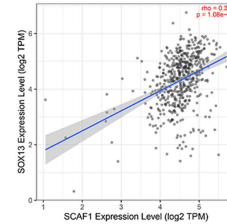**KIRP**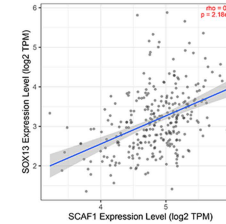**LIHC**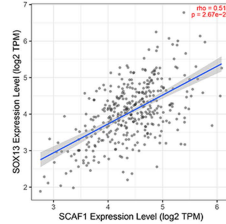**LUAD**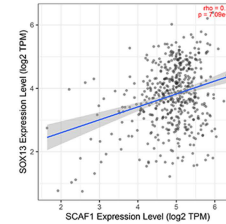**LUSC**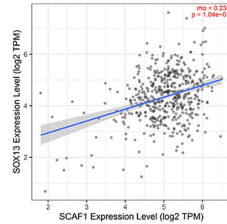**OV**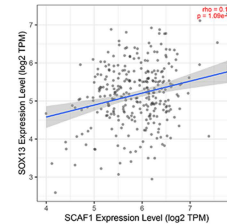**PAAD**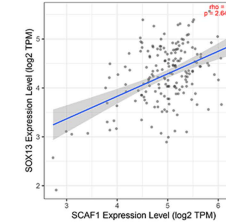**PRAD**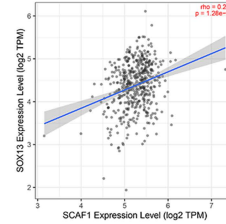**READ**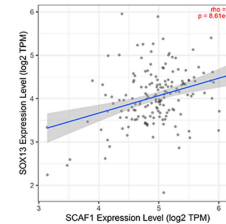**SARC**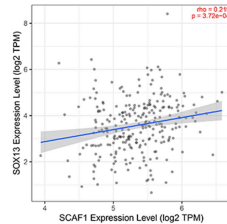**STAD**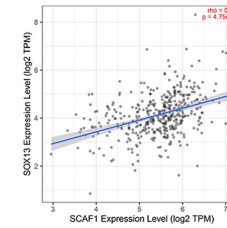**TGCT**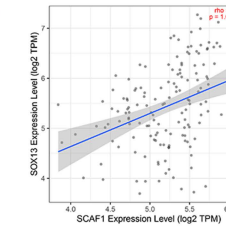**THCA**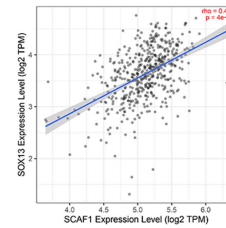**THYM**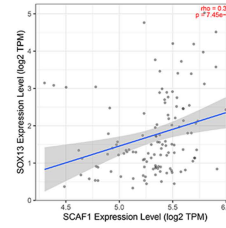**UCEC**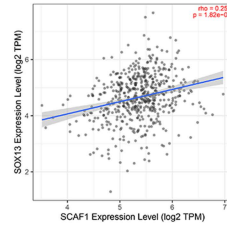

**Supplementary Figure 11.** Scatterplots of correlations between SOX13 expression and SCAF1 expression adjusted by purity according to TIMER (<http://cistrome.org/TIMER/>) in BLCA (bladder urothelial carcinoma, n=408), BRCA (breast invasive carcinoma, n=1100), BRCA-LumA (breast invasive carcinoma luminal A type, n=568), CESC (Cervical squamous cell carcinoma and endocervical adenocarcinoma, n=306), DLBC (Lymphoid Neoplasm Diffuse Large B-cell Lymphoma, n=48), ESCA (Esophageal carcinoma, n=185), GBM (Glioblastoma multiforme, n=153), HNSC (Head and Neck squamous cell carcinoma, n=522), HNSC-HPV- (Head and Neck squamous cell carcinoma HPV negative, n=422), HNSC-HPV+ (Head and Neck squamous cell carcinoma HPV positive, n=98), KIRC (Kidney renal clear cell carcinoma, n=533), KIRP (Kidney renal papillary cell carcinoma, n=290), LIHC (Liver hepatocellular carcinoma, n=371), LUAD (Lung adenocarcinoma, n=515), LUSC (Lung squamous cell carcinoma, n=501), OV (Ovarian serous cystadenocarcinoma, n=303), PAAD (Pancreatic adenocarcinoma, n=179), PRAD (Prostate adenocarcinoma, n=498), READ (Rectum adenocarcinoma, n=166), SARC (Sarcoma, n=260), STAD (Stomach adenocarcinoma, n=415), TGCT (Testicular Germ Cell Tumors, n=150), THCA (Thyroid carcinoma, n=509), THYM (Thymoma, n=120), UCEC (Uterine Corpus Endometrial Carcinoma, n=545).

**BLCA**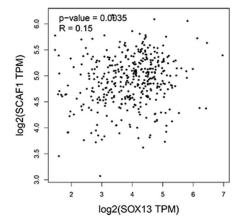**BRCA**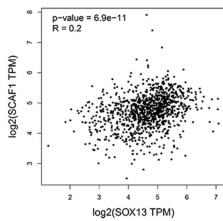**CESC**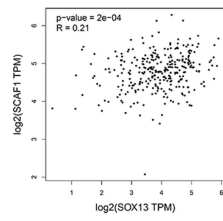**COAD**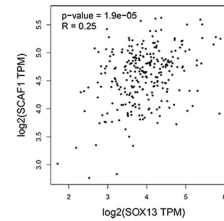**DLBC**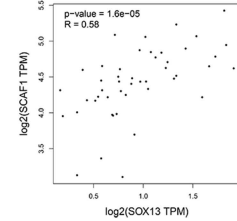**HNSC**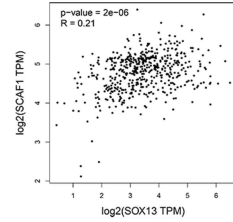**KIRC**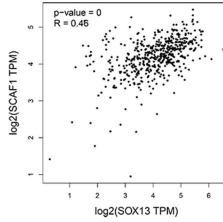**KIRP**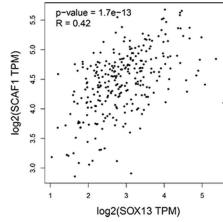**LGG**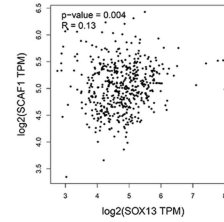**LIHC**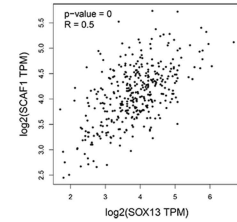**LUAD**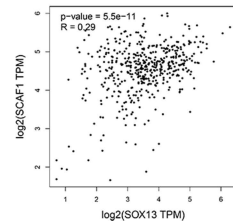**LUSC**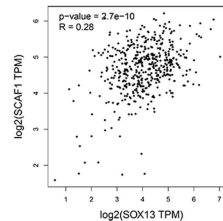**OV**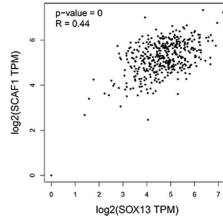**PAAD**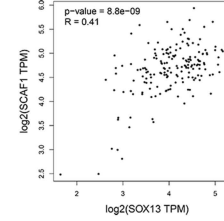**PRAD**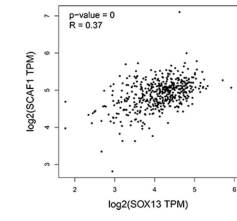**SARC**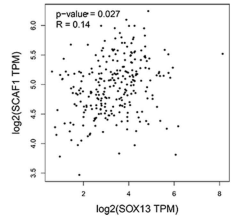**STAD**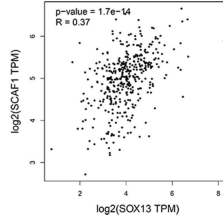**TGCT**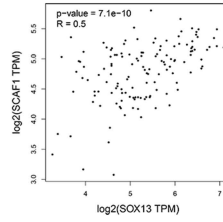**THCA**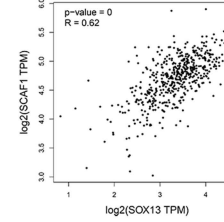**THYM**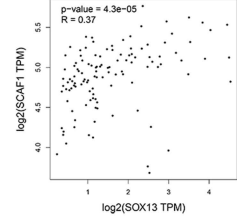**UCEC**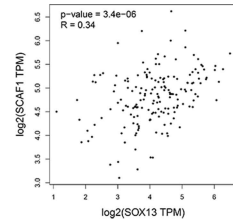

**Supplementary Figure 12.** Correlation results between SOX13 and SCAF1 according to GEPIA (<http://gepia.cancer-pku.cn/>) in BLCA, BRCA, CESC, COAD, DLBC, HNSC, KIRC, KIRP, LGG (Brain Lower Grade Glioma), LIHC, LUAD, LUSC, OV, PAAD, PRAD, SARC, STAD, TGCT, THCA, THYM, UCEC.

**A**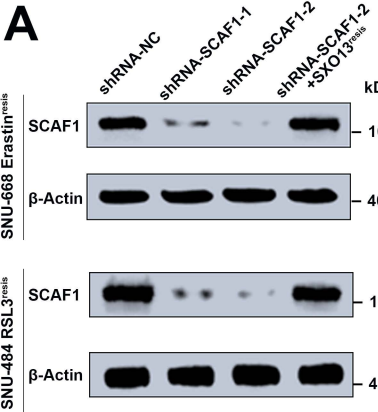**B****SNU-668 Erastin<sup>resis</sup>**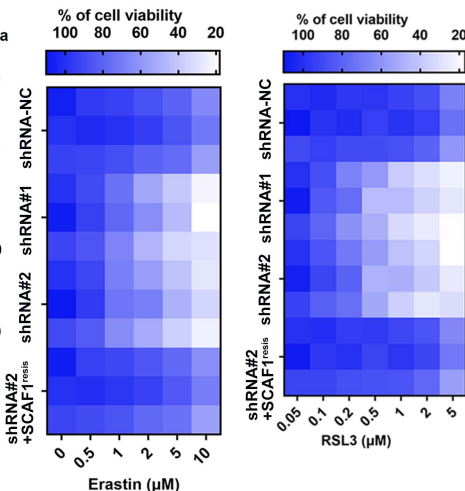**SNU-484 RSL3<sup>resis</sup>**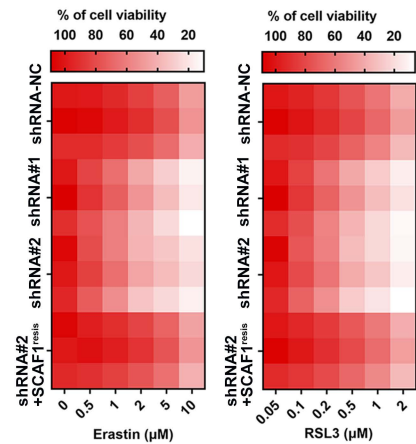**C**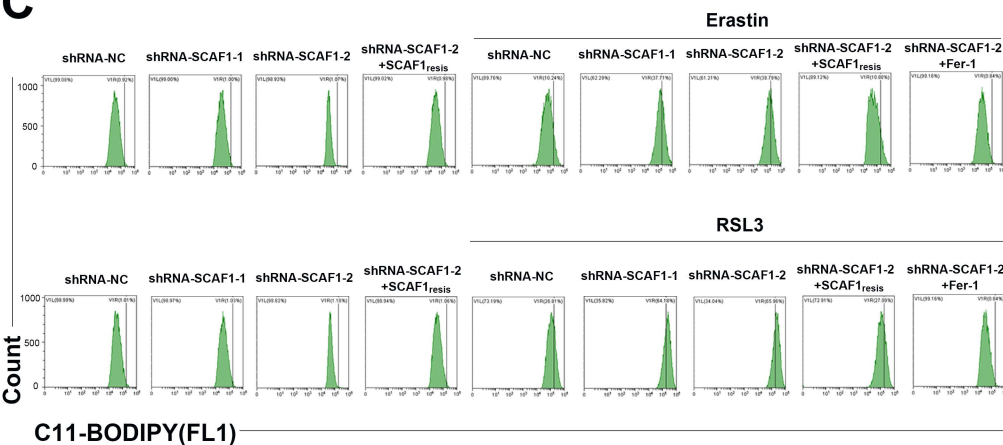**Count****C11-BODIPY(FL1)****D**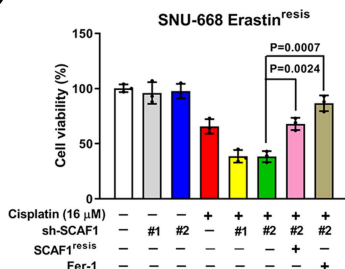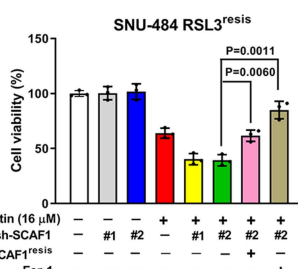

**Supplementary Figure 13.** (A-D) SNU-668 Erastin<sup>resis</sup> cells or SNU-484 RSL3<sup>resis</sup> cells were transduced of lentiviruses encoding SCAF1 shRNA-1 or shRNA-2 or a scrambled shRNA and/or resistant SOX13 cDNA (SOX13<sup>resis</sup>). (A) SCAF1 was determined by immunoblotting assay and normalized to  $\beta$ -actin (n=3 independent experiments). (B,C) Effect of knockdown of SCAF1 and SCAF1 re-expression on sensitivity of SNU-668 Erastin<sup>resis</sup> cells or SNU-484 RSL3<sup>resis</sup> cells to the ferroptosis inducers RSL3 or Erastin. Cells transfected with desired vector were treated with various concentrations of RSL3 or Erastin for 24 hours. (B) The heatmap shows altered cell viability. (C) SNU-484 RSL3<sup>resis</sup> cells transfected with desired vector were treated with Erastin (2  $\mu$ M) or RSL3 (0.5  $\mu$ M) for 24 hours. Lipid peroxidation was determined with a lipid peroxidation C11-BODIPY assay (n=3 independent experiments), and a representative flow cytometry histogram plot is presented. Data are presented as mean values  $\pm$  SD. (D) Effect of SCAF1 downregulation on cisplatin sensitivity in the absence or presence of Fer-1 (1  $\mu$ M) in Erastin<sup>resis</sup> SNU-668 cells or RSL3<sup>resis</sup> SNU-484 cells. The cells were treated with cisplatin (16  $\mu$ M) for 24 hours. Cell viability was evaluated with a CellTiter-Glo luminescent cell viability assay (n=3 independent experiments). Data are presented as mean values  $\pm$  SD. Statistical significance in (C,D) is determined by two-tailed unpaired *t*-test. Source data are provided as a Source Data file.

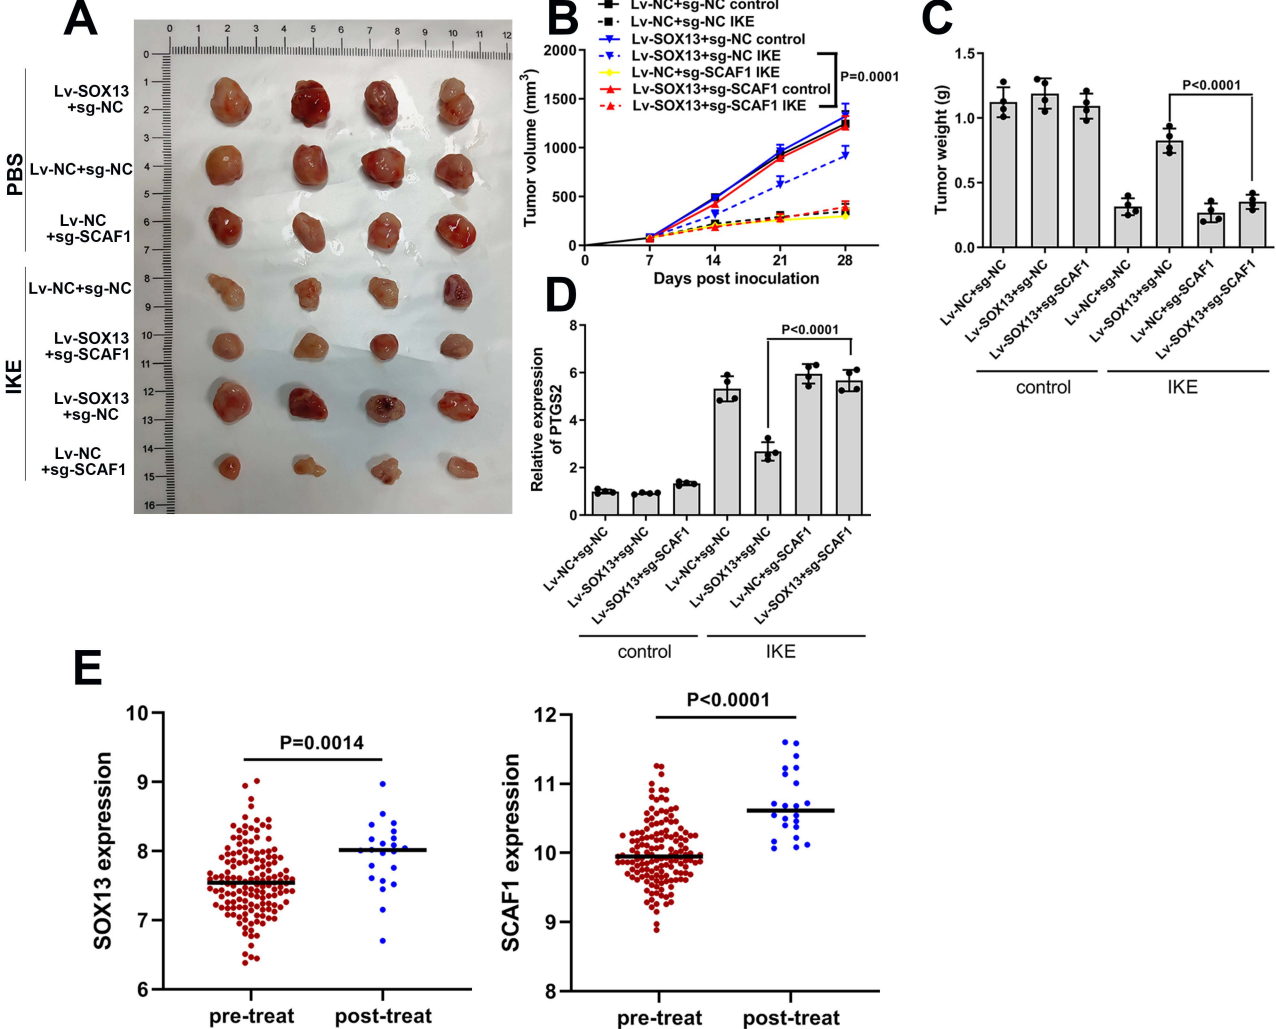

**Supplementary Figure 14.** (A-D) SOX13-overexpressing CDX tumors (Lv-SOX13), SCAF1 KO-CDX tumors (sg-SCAF1) and control SNU-668-CDX tumors were treated with IKE 7 days after injection. Representative images of tumors formed (A), tumor growth curves (B), tumor weights (C), and PTGS2 expression (D) analysis are shown (n=4 mice per group). Data are presented as mean values  $\pm$  SD. (E) SOX13 and SCAF1 expression levels were significantly increased after acquiring resistance to CF combination chemotherapy. Data are presented as mean values  $\pm$  SD. Two-tailed unpaired t-test (B-D) or two-tailed paired t-test test (E). Source data are provided as a Source Data file.



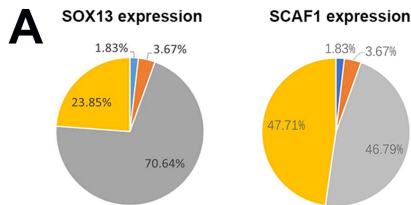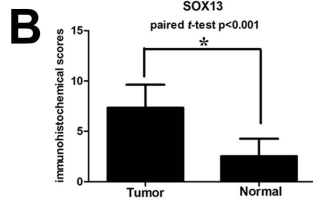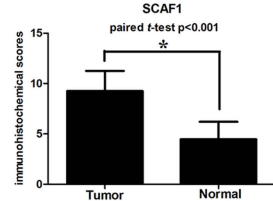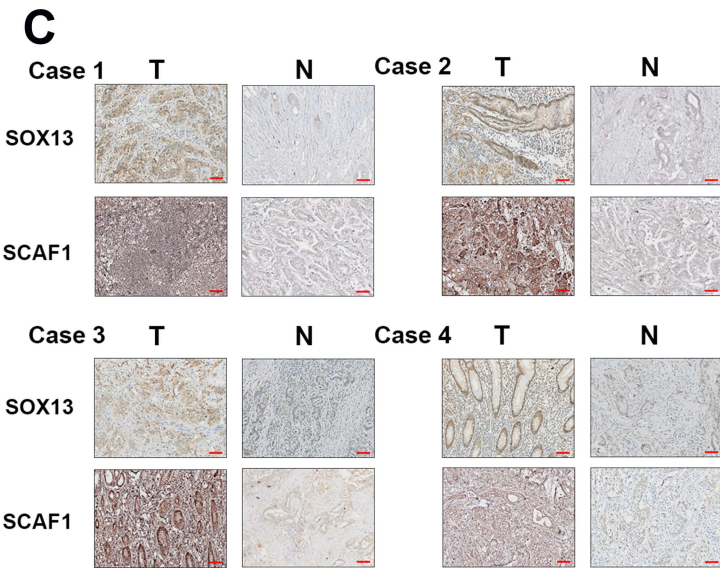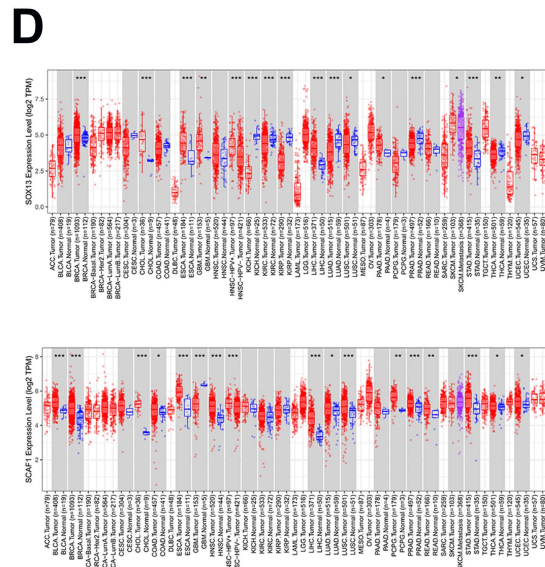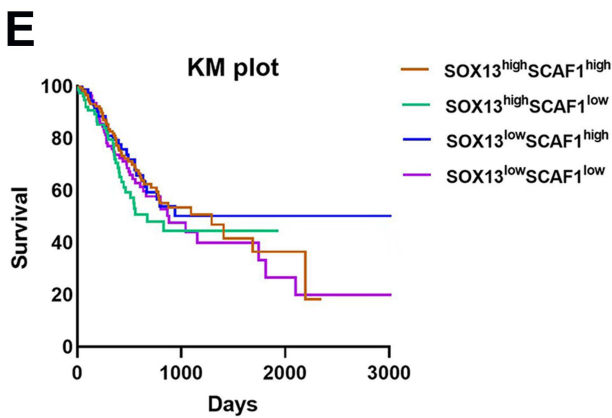

**Supplementary Figure 15.** (A) Immunohistochemical staining of SOX13/SCAF1 in 109 GC samples and matched normal stomach tissues. The expression was scored as negative (-), low (+), intermediate (++), or high (+++). (B) SOX13/SCAF1 immunohistochemical scores in 109 GC tissues and matched normal stomach tissues (paired *t* test,  $p < 0.0001$ ). Data are presented as mean values  $\pm$  SD. (C) Representative immunohistochemical staining images for SOX13/SCAF1 are presented. Scale bar: 50  $\mu$ m. (D) Normalized expression of SOX13 and SCAF1 across different tumor types from TIMER data showing high overall expression in STAD. (E) Kaplan–Meier analysis of concurrent SOX13 and SCAF1 expression with overall survival in patients receiving surgery only according to data from TCGA-STAD. Two-tailed paired *t*-test (B) or two-sided log-rank test (E).

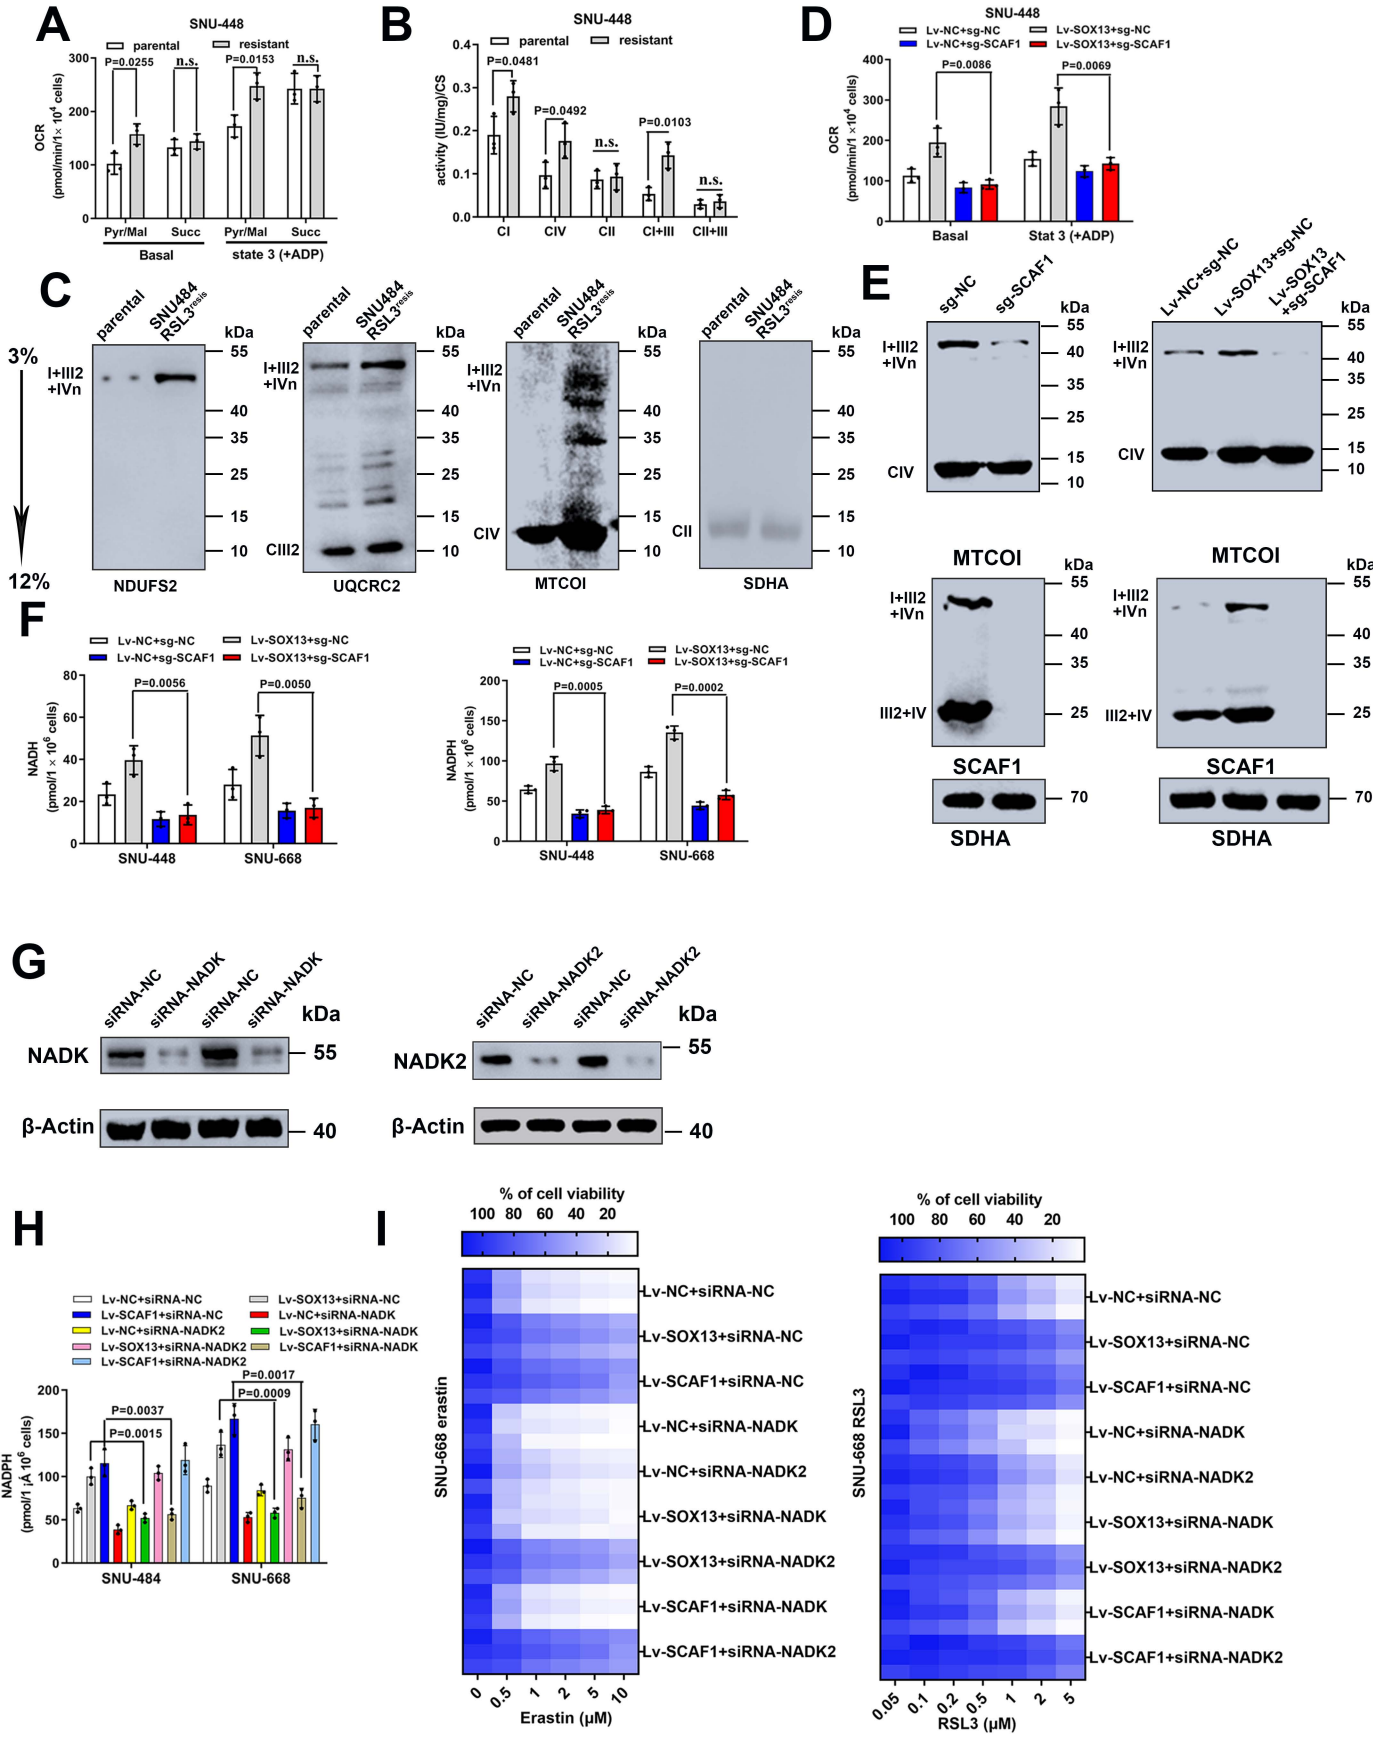

**Supplementary Figure 16.** (A) Oxygen consumption analysis was performed in isolated mitochondria of parental and resistant SNU-484 cells using pyruvate-malate or succinate as specific substrates, respectively (n=3 independent experiments). Data are presented as mean values  $\pm$  SD. (B) Mitochondrial enzymatic activities of CI, CIV, CII, CI+III, and CII+III normalized to citrate synthase (CS) levels in parental and resistant SNU-484 cells (n=3 independent experiments). Data are presented as mean values  $\pm$  SD. (C) Western blot analysis of the indicated proteins, including CI, CIII, CIV, and CII, after blue native PAGE (BN-PAGE) of digitonin-solubilized mitochondria from parental and resistant SNU-484 cells (n=3 independent experiments). (D) Oxygen consumption rates of isolated mitochondria from parental SNU-484 cells with SOX13 overexpression (Lv-SOX13) alone, SCAF1 KO (sg-SCAF1) alone or the two in combination (n=3 independent experiments). Data are presented as mean values  $\pm$  SD. (E) SC levels in parental SNU-484 cells with SOX13 overexpression (Lv-SOX13) alone, SCAF1 KO (sg-SCAF1) alone or the two in combination (n=3 independent experiments). (F) The increased NADH/NADPH production in parental cells induced by SOX13 overexpression was attenuated with SCAF1 silencing (n=3 independent experiments). Data are presented as mean values  $\pm$  SD. (G) NADK and NADK2 protein expression levels were measured by Western blot analysis (n=3 independent experiments).  $\beta$ -Actin served as a loading control. (H) The cellular NADPH level was significantly decreased with silencing of the cytosolic enzyme NADK; however, downregulation of the mitochondrial enzyme NADK2 had no such effects (n=3 independent experiments). Data are presented as mean values  $\pm$

SD. (I) The survival benefit of SOX13/SCAF1-overexpressing parental SNU-668 cells was largely eliminated with NADK silencing. The cells were exposed to RSL3 (0.5  $\mu$ M) or Erastin (2  $\mu$ M) for 24 hours. Statistical significance in (A,B,D,F,H) is determined by two-tailed unpaired *t*-test. Source data are provided as a Source Data file.

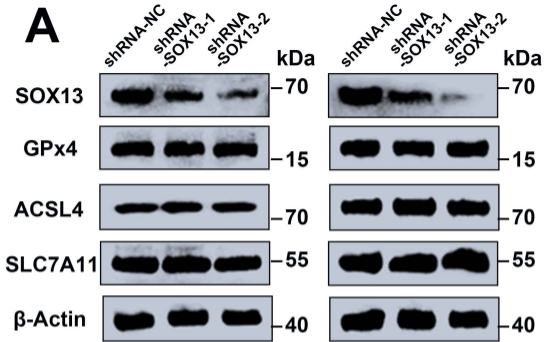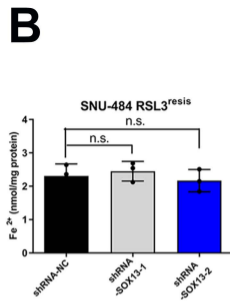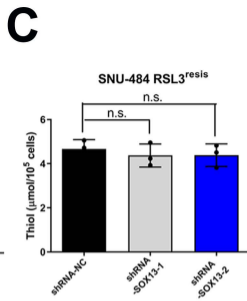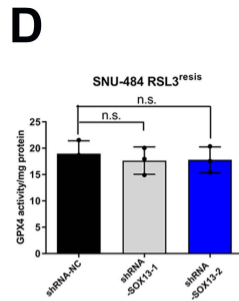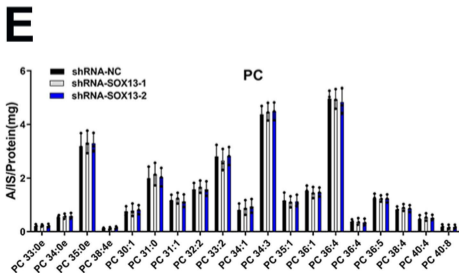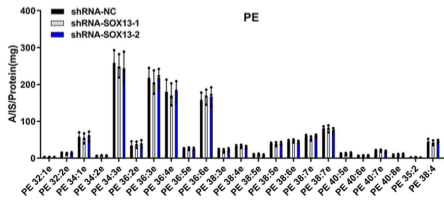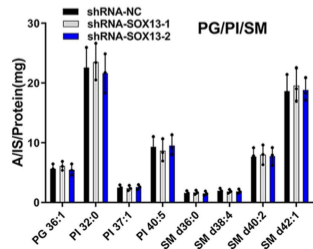

**Supplementary Figure 17.** (A-E) Effect of SOX13 knockdown on the expression of GPX4, SLC7A11, and ACSL4 (A), cellular divalent iron levels (B), system Xc<sup>-</sup> (C) and GPX4 activity (D) or cellular phospholipid composition (E). (A) GPX4, SLC7A11, and ACSL4 protein expression levels were measured by Western blot analysis (n=3 independent experiments).  $\beta$ -Actin served as a loading control. Cellular divalent iron levels (B), system Xc<sup>-</sup> (C) and GPX4 activity (D) were determined as described in the Materials and methods in SNU-484 RSL3<sup>resis</sup> cells (n=3 independent experiments). Data are presented as mean values  $\pm$  SD. (E) Lipidomic profile of SNU-484 RSL3<sup>resis</sup> (control or SOX13 downregulated) cells. The data represents the mean value of the ratio of the area of analyte (A)/internal standard (IS)/protein (mg). Each group has three replicates, and results were representative of three independent experiments. Data are presented as mean values  $\pm$  SD. Statistical significance in (B-E) is determined by two-tailed unpaired *t*-test. Source data are provided as a Source Data file.

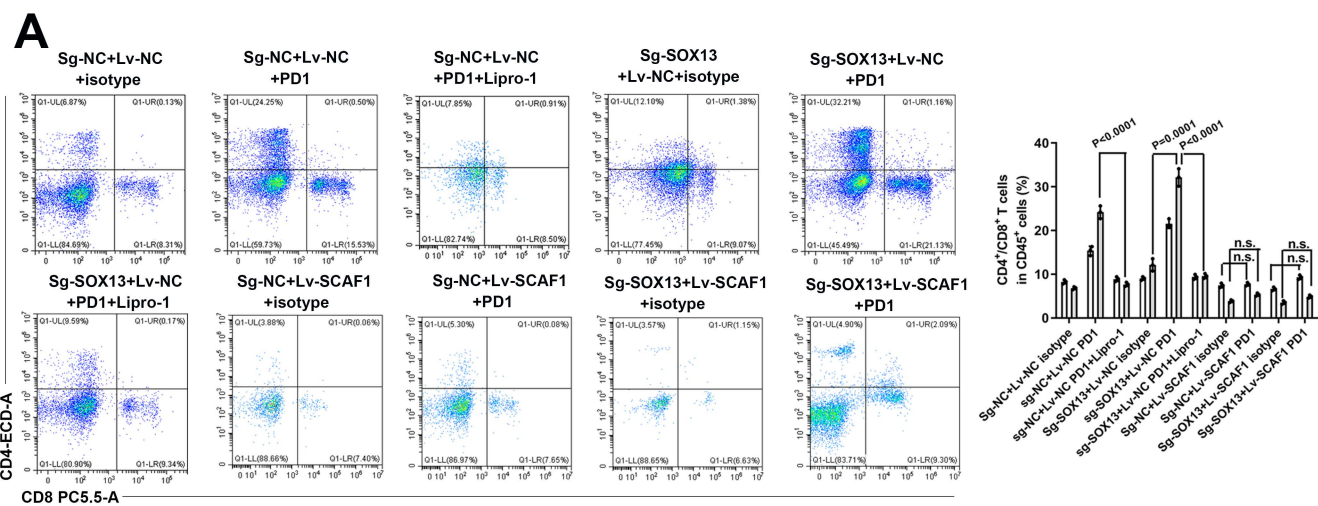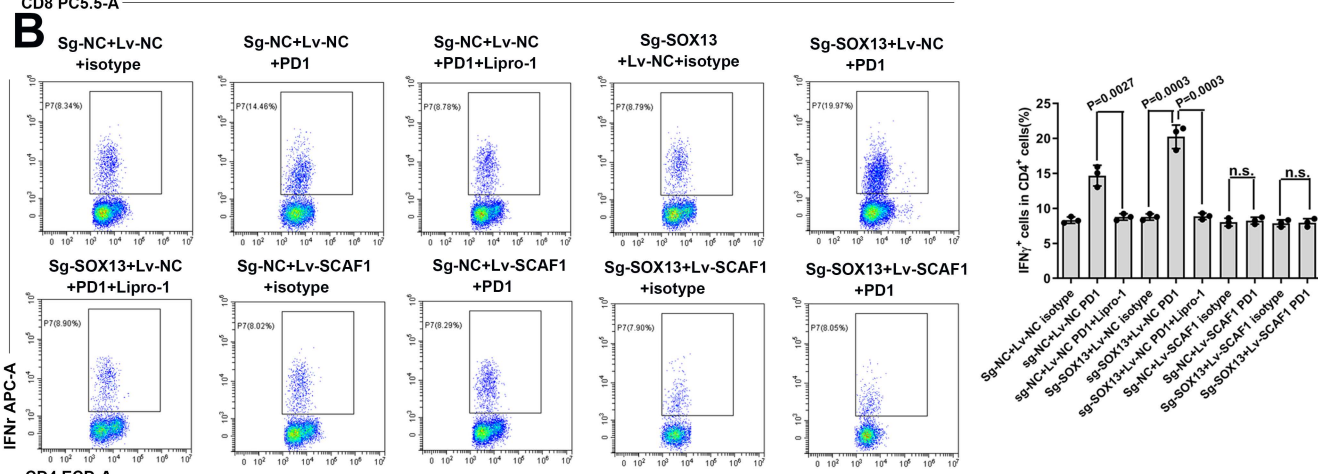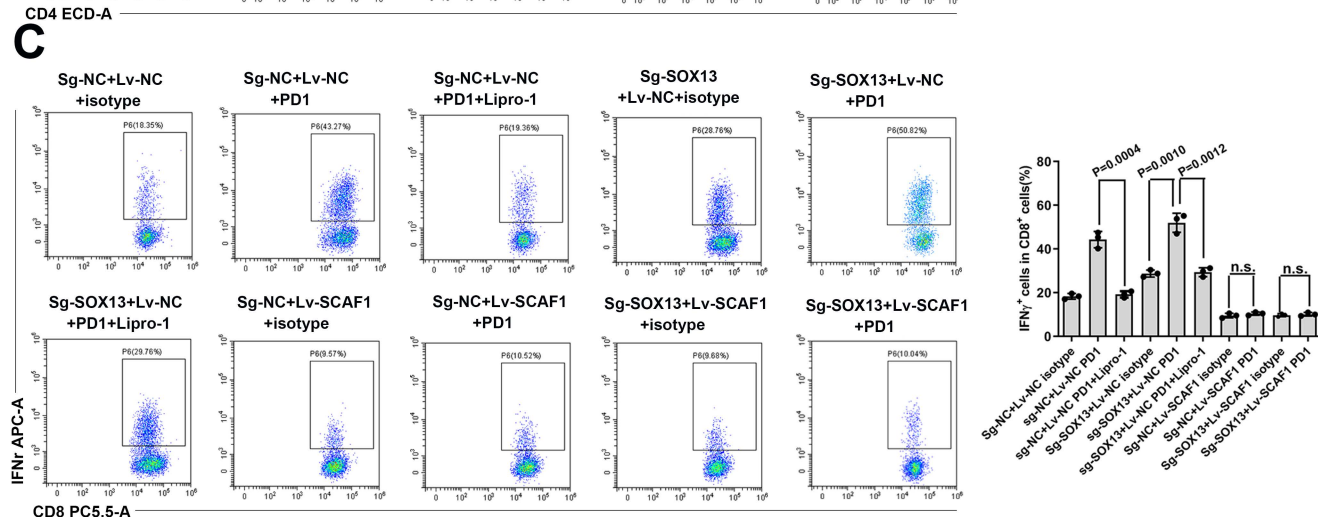



**Supplementary Figure 18.** (A-C) Representative flow cytometry analysis and quantification of the indicated CD8<sup>+</sup> and CD4<sup>+</sup> TILs in YTH16 (m)-derived xenografts with the treatment described above (n=3 independent experiments). Data are presented as mean values  $\pm$  SD. Statistical significance in (A-C) is determined by two-tailed unpaired *t*-test. Source data are provided as a Source Data file.

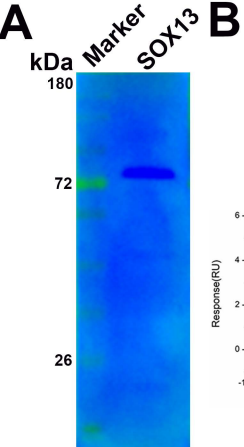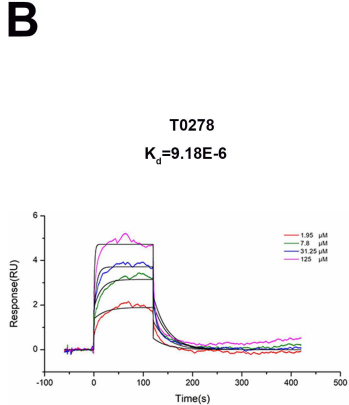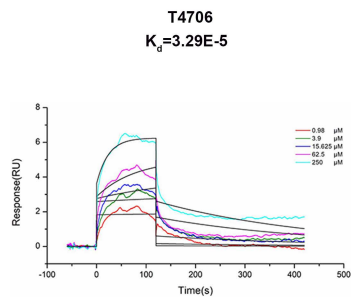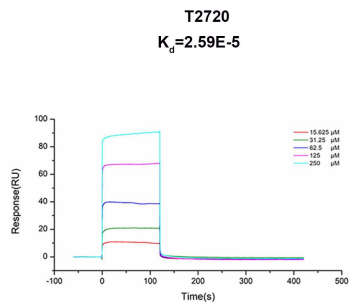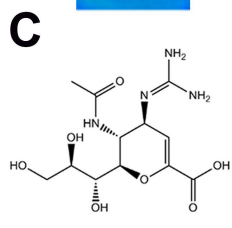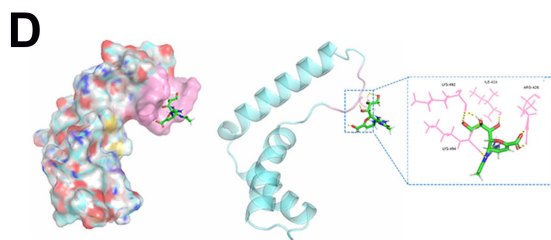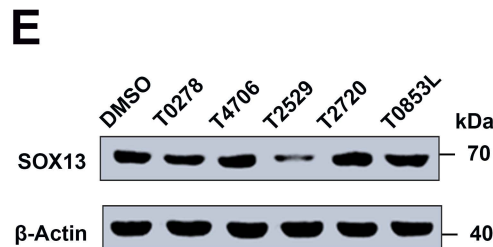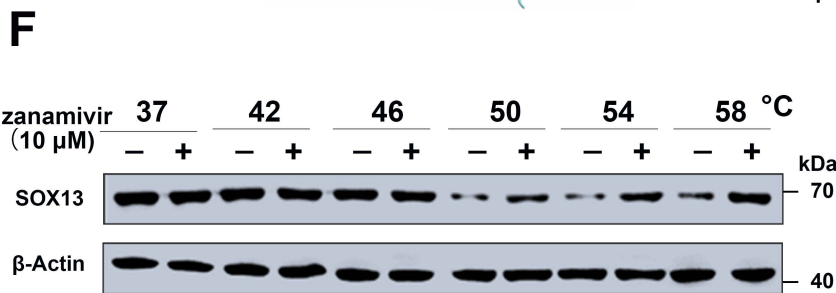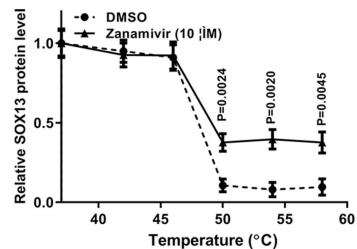

**Supplementary Figure 19.** (A) Coomassie blue staining showing the purity of recombinant human SOX13 protein. (B) SPR analysis results showing the binding of the SOX13 protein to several other small molecules (T0278, T4706 and T2720). (C) Chemical structures of zanamivir. (D) Computational molecular docking analysis to investigate the interaction of zanamivir binding to SOX13. The green molecule represents zanamivir. (E) Western blot analysis of the expression of SOX13 in Erastin<sup>resis</sup> SNU-668 cells treated with different compounds (10  $\mu$ M) for 36 h (n=3 independent experiments). (F) Melt curves of SOX13 protein in CETSA in Erastin<sup>resis</sup> SNU-668 cells treated with zanamivir or vehicle for 1 h. The graph shows the quantification of SOX13 protein versus temperature points based on Western blot analyses (n=3 independent experiments). Data are presented as mean values  $\pm$  SD. Statistical significance in (F) is determined by two-tailed unpaired *t*-test. Source data are provided as a Source Data file.

**A****SNU-668 Erastin<sup>resis</sup>**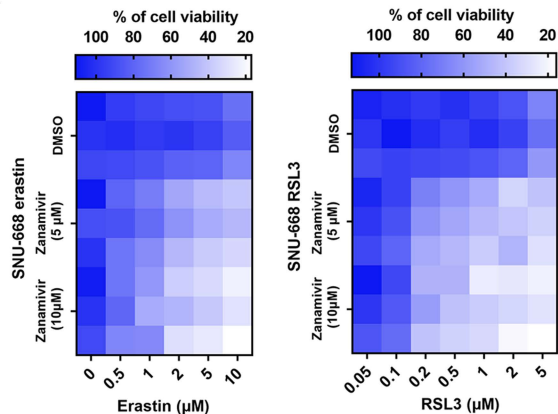**SNU-484 RSL3<sup>resis</sup>**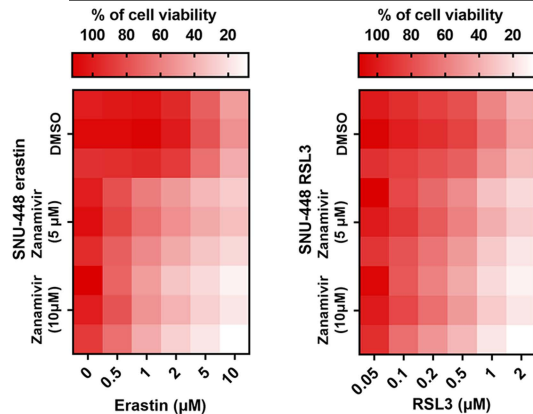**B**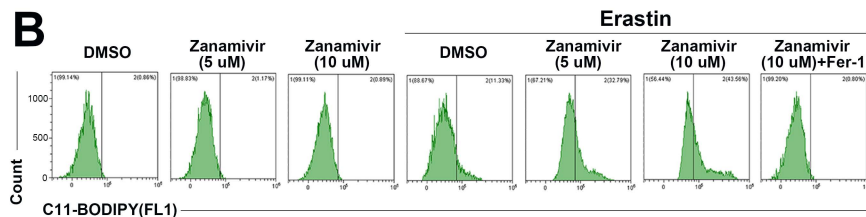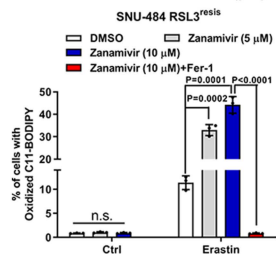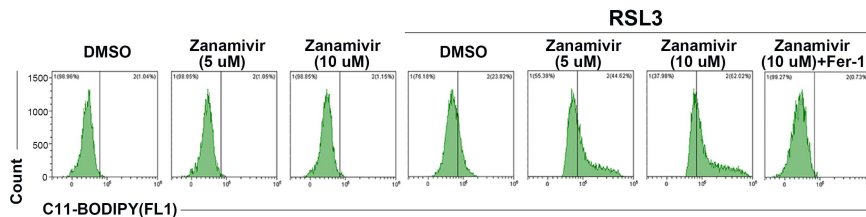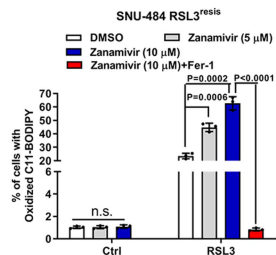

**Supplementary Figure 20.** (A) The Erastin<sup>resis</sup> SNU-668 cells or RSL3-resistant SNU-484 cells were pretreated with zanamivir (0  $\mu$ M, 5  $\mu$ M, 10  $\mu$ M) for 12 h and then exposed to various concentrations of RSL3 or Erastin for 24 hours. The heatmap shows altered cell viability. (B) The RSL3<sup>resis</sup> SNU-484 cells were pretreated with zanamivir (0  $\mu$ M, 5  $\mu$ M, 10  $\mu$ M) for 12h and then exposed to Erastin (2  $\mu$ M) or RSL3 (0.5  $\mu$ M) for 24 hours. Lipid peroxidation was determined using a lipid peroxidation C11-BODIPY assay (n=3 independent experiments), and representative flow cytometry histogram plot is presented. Data are presented as mean values  $\pm$  SD. Statistical significance in (B) is determined by two-tailed unpaired *t*-test. Source data are provided as a Source Data file.

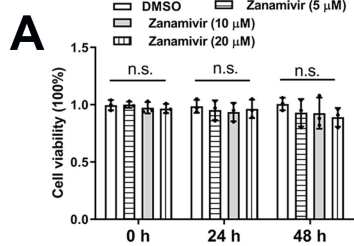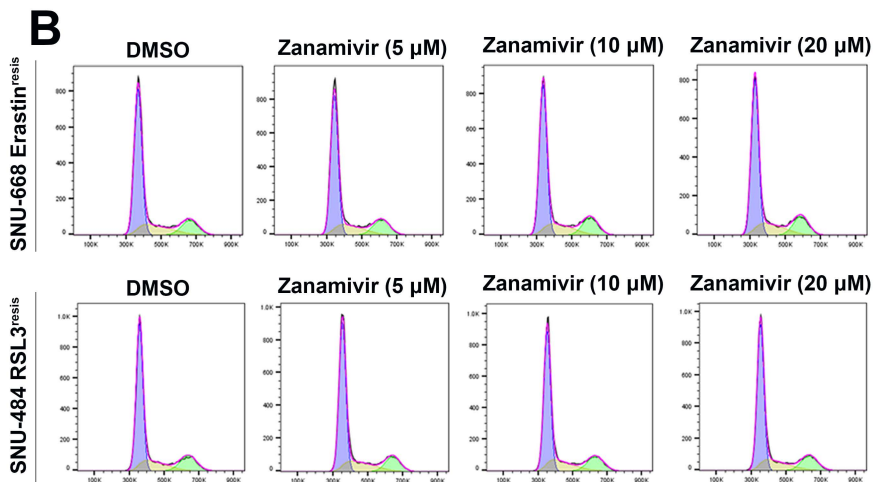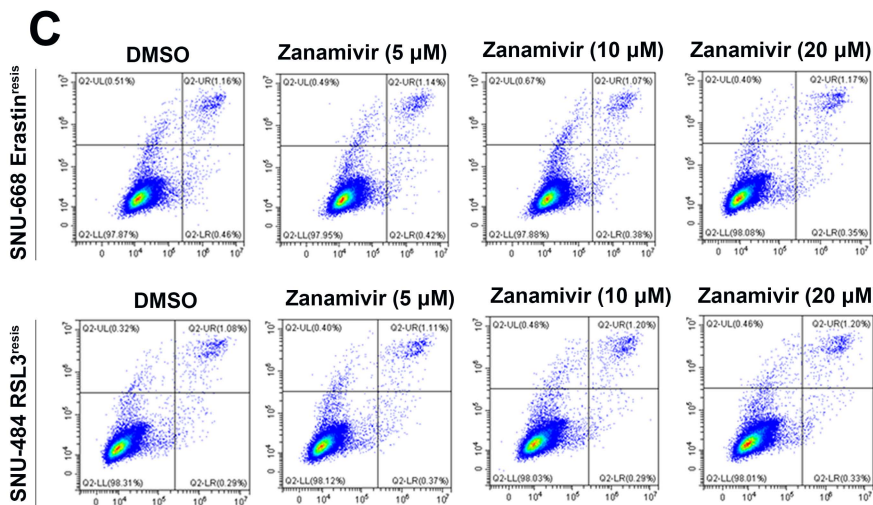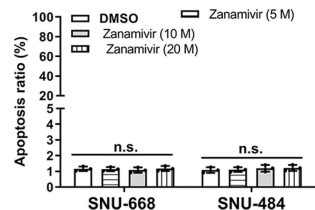

Annexin (FITC)

**Supplementary Figure 21.** (A-C) The Erastin<sup>resis</sup> SNU-668 cells or RSL3<sup>resis</sup> SNU-484 cells were pretreated with zanamivir (0  $\mu$ M, 5  $\mu$ M, 10  $\mu$ M, 20  $\mu$ M) for 48 h (A) or 36 h (B-C). (A) Relative viability was determined in Erastin<sup>resis</sup> SNU-668 cells (n=3 independent experiments). Data are presented as mean values  $\pm$  SD. (B) Cell cycle analysis determined the relative cell numbers in each cell-cycle phase with propidium iodide staining (n=3 independent experiments). Data are presented as mean values  $\pm$  SD. (C) Annexin V/PI staining and flow cytometry analysis assessing apoptosis (n=3 independent experiments). Data are presented as mean values  $\pm$  SD. Statistical significance in (A-C) is determined by two-tailed unpaired *t*-test. Source data are provided as a Source Data file.

**A**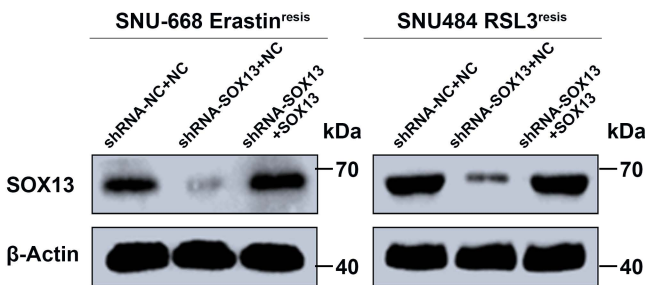**B**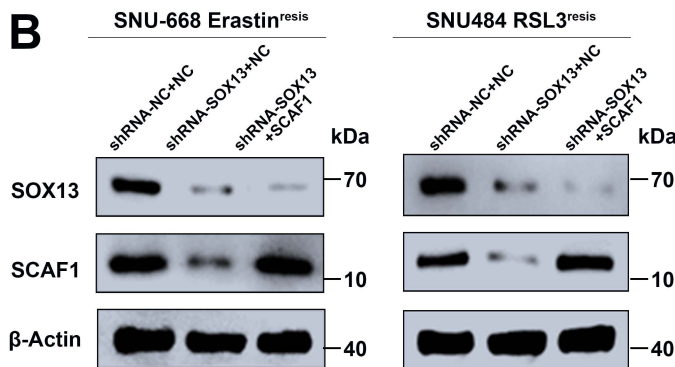**C**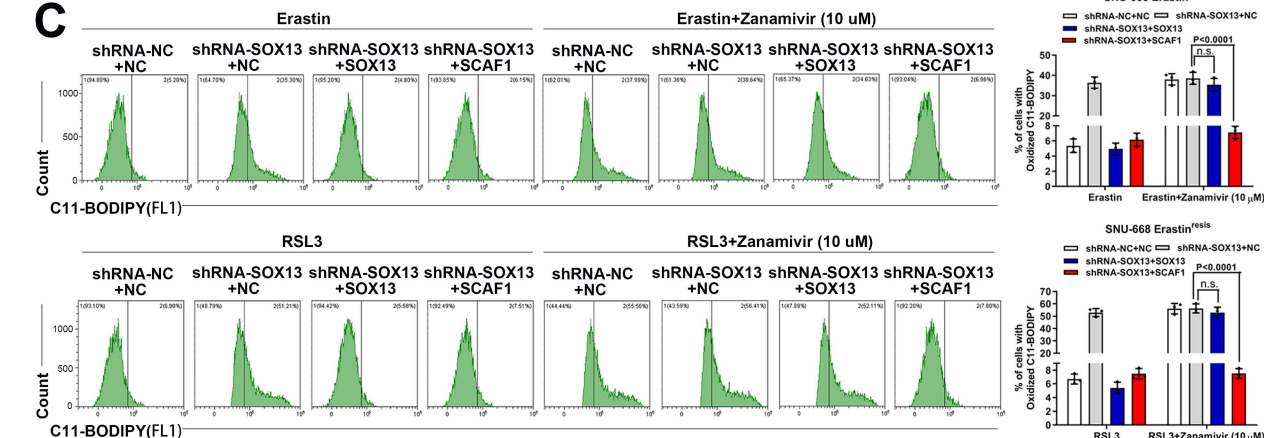**D**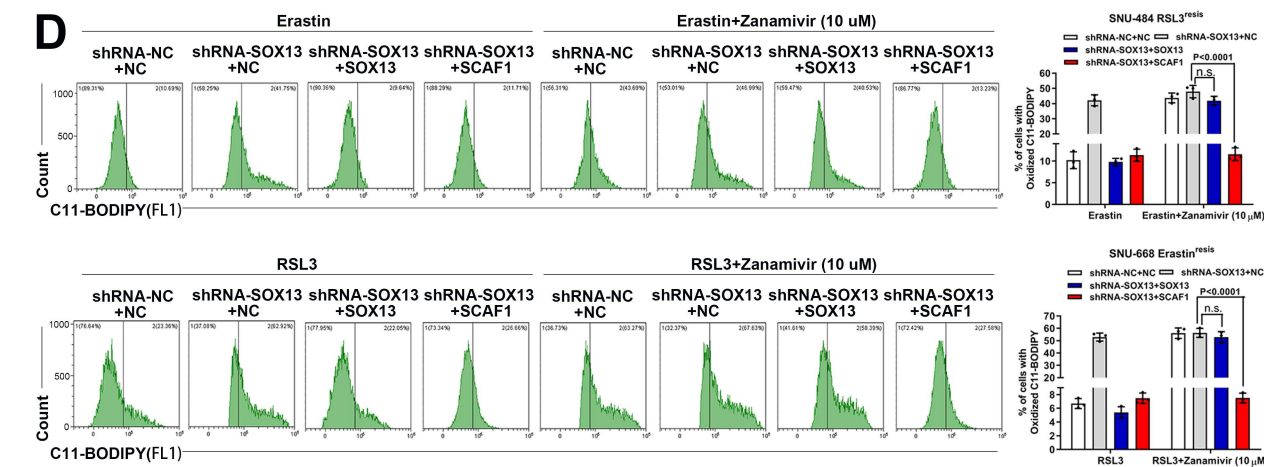



**Supplementary Figure 22.** (A,B) Wild-type SOX13 (A) or SCAF1 (B) were re-overexpressed in SOX13-deficient FINs resistant cells. SOX13, and SCAF1 protein expression levels were measured by Western blot analysis (n=3 independent experiments). (C,D) Wild-type SOX13 or SCAF1 were re-overexpressed in SOX13-deficient Erastin<sup>resis</sup> SNU-668 cells (C) or RSL3<sup>resis</sup> SNU-484 cells (D). Cells were pretreated with zanamivir (0  $\mu$ M, 10  $\mu$ M) for 12h and exposed to Erastin (2  $\mu$ M) or RSL3 (0.5  $\mu$ M) for 24 hours. The sensitivity of cells to FINs was evaluated with a lipid peroxidation C11-BODIPY assay (n=3 independent experiments). Data are presented as mean values  $\pm$  SD. Statistical significance in (C,D) is determined by two-tailed unpaired *t*-test. Source data are provided as a Source Supplementary Figure 22. (A,B) Wild-type SOX13 (A) or SCAF1 (B) were re-overexpressed in SOX13-deficient FINs resistant cells. SOX13, and SCAF1 protein expression levels were measured by Western blot analysis (n=3 independent experiments). (C,D) Wild-type SOX13 or SCAF1 were re-overexpressed in SOX13-deficient Erastin<sup>resis</sup> SNU-668 cells (C) or RSL3<sup>resis</sup> SNU-484 cells (D). Cells were pretreated with zanamivir (0  $\mu$ M, 10  $\mu$ M) for 12h and exposed to Erastin (2  $\mu$ M) or RSL3 (0.5  $\mu$ M) for 24 hours. The sensitivity of cells to FINs was evaluated with a lipid peroxidation C11-BODIPY assay (n=3 independent experiments). Data are presented as mean values  $\pm$  SD. Statistical significance in (C,D) is determined by two-tailed unpaired *t*-test. Source data are provided as a Source Data file.

**A**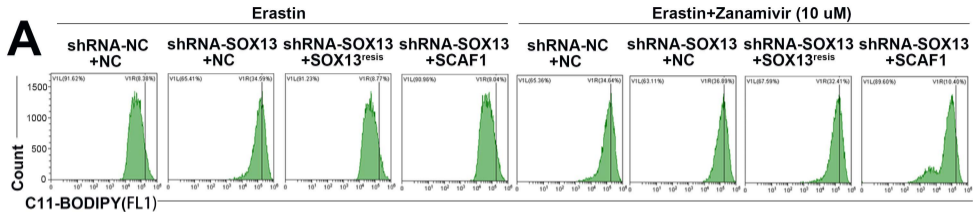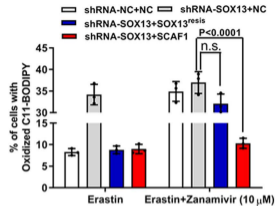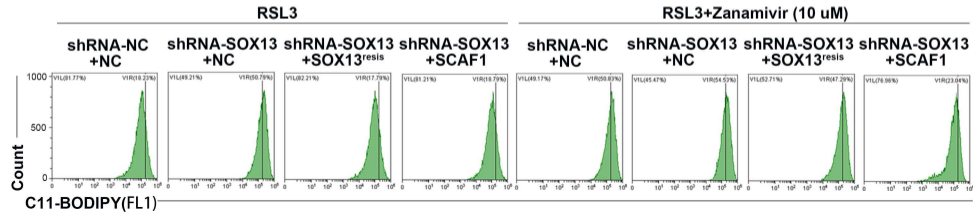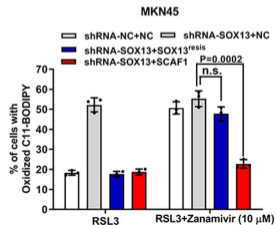

**Supplementary Figure 23.** Wild-type SOX13 or SCAF1 were re-overexpressed in SOX13-deficient MKN45 cells. Cells were pretreated with zanamivir (0  $\mu$ M, 10  $\mu$ M) for 12h and exposed to Erastin (2  $\mu$ M) or RSL3 (0.5  $\mu$ M) for 24 hours. The sensitivity of cells to FINs was evaluated with a lipid peroxidation C11-BODIPY assay (n=3 independent experiments). Data are presented as mean values  $\pm$  SD. Statistical significance in (A) is determined by two-tailed unpaired *t*-test. Source data are provided as a Source Data file.

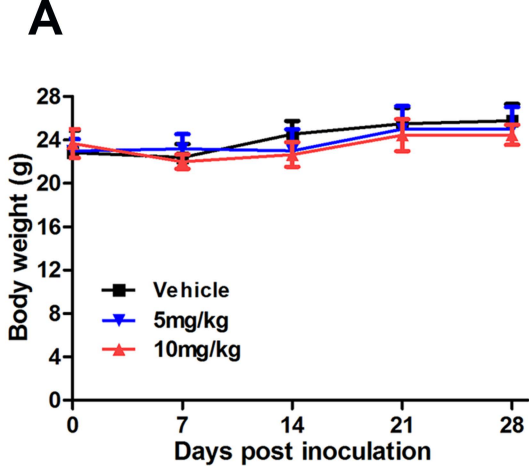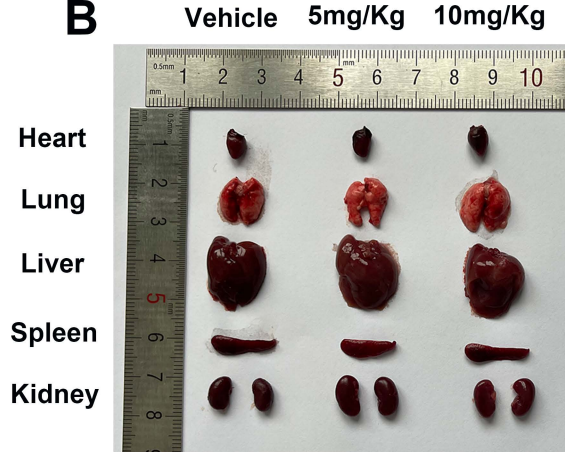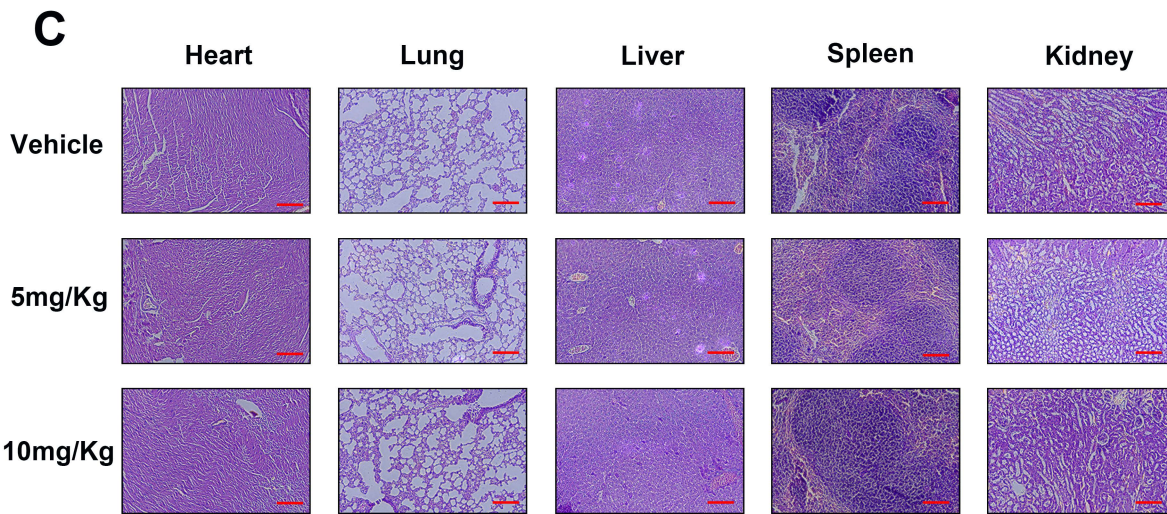

**Supplementary Figure 24.** (A) Body weights of mice in 28 days of treatment with vehicle or zanamivir (5 mg/kg and 10 mg/kg). (B) The size and appearance of heart, liver, spleen, lung and kidney of each group in Erastin<sup>resis</sup> SNU-668 xenograft model. (C) HE staining of heart, liver, spleen, lung and kidney of each group. Scale bars: 200  $\mu\text{m}$  (100 $\times$  magnification).

**A**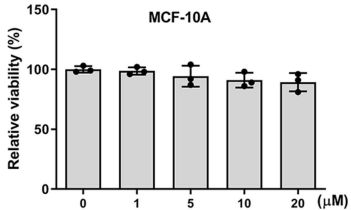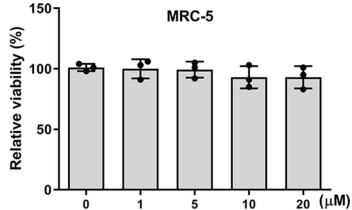**B**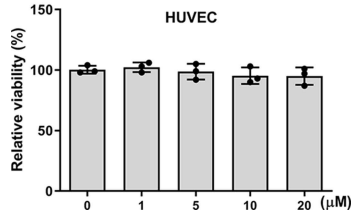

**Supplementary Figure 25.** Toxicity of zanamivir in non-tumorigenic epithelial and endothelial cells. (A) Zanamivir has little effect on the viability of non-tumorigenic mammary and pulmonary epithelial cells, MCF-10A and MRC-5 (n=3 independent experiments). (B) Zanamivir has no effect on the viability of human umbilical vein endothelial cells HUVEC (n=3 independent experiments). Data are presented as mean values  $\pm$  SD. Statistical significance in (A,B) is determined by two-tailed unpaired *t*-test. Source data are provided as a Source Data file.





**Supplementary Figure 26.** (A) qRT-PCR results showing the mRNA expression of SOX13 in Erastin<sup>resis</sup> SNU-668 cells treated with zanamivir (0  $\mu$ M, 5  $\mu$ M, 10  $\mu$ M, and 20  $\mu$ M) for 36 h (n=3 independent experiments). Data are presented as mean values  $\pm$  SD. (B) The Erastin<sup>resis</sup> SNU-668 cells were pretreated with zanamivir (0  $\mu$ M, 5  $\mu$ M, 10  $\mu$ M, 20  $\mu$ M) for 36 h. SOX2, SOX4, and SOX9 protein expression levels were measured by Western blot analysis and normalized to  $\beta$ -Actin (n=3 independent experiments). (C) Western blot analysis of SOX13 expression in Erastin<sup>resis</sup> SNU-668 cells or RSL3<sup>resis</sup> SNU-484 cells overexpressing TRIM25, FBXO28 or TRAF2 (n=3 independent experiments). (D) qRT-PCR results showing the expression level of SOX13 in TRIM25-overexpressing and TRIM25-knockdown Erastin<sup>resis</sup> SNU-668 cells (n=3 independent experiments). Data are presented as mean values  $\pm$  SD. (E) TRIM25-WT, TRIM25-2EA or vector control were overexpressed in Erastin<sup>resis</sup> SNU-668 cells. The cells were treated with zanamivir (10  $\mu$ M) for 12h before exposed to Erastin (2  $\mu$ M) or RSL3 (0.5  $\mu$ M) for 24 hours. Lipid peroxidation was determined utilizing a lipid peroxidation C11-BODIPY assay (n=3 independent experiments), and representative flow cytometry histogram plot is presented. Data are presented as mean values  $\pm$  SD. (F) Immunoprecipitation results showing the interaction between SOX13 and TRIM25 (n=3 independent experiments). Statistical significance in (A,D,E) is determined by two-tailed unpaired *t*-test. Source data are provided as a Source Data file.
